# Supplementary material for: Zinc 8-aminotrihydroquinolines appended with pendant N-diphenylphosphinoethyl arms as exceptionally active catalysts for the ROP of ε-CL
Source: Royal Society of Chemistry journal article supplement (doi:10.1039/d2cy00979j), 2022-01-01
Supplement: d2cy00979j1.pdf [file d2cy00979j1.pdf]

## Supporting information

for

### Zinc 8-aminotrihydroquinolines appended with pendant *N*-diphenylphosphinoethyl arms as exceptionally active catalysts for the ROP of $\epsilon$ -CL

Furong Cao,<sup>a,b</sup> Yun Wang,<sup>a,b</sup> Xing Wang,<sup>a,b</sup> Wenjuan Zhang,<sup>a,\*</sup> Gregory A. Solan,<sup>c,\*</sup> Rui Wang<sup>a</sup>, Yanping Ma,<sup>b</sup> Xiang Hao,<sup>b</sup> Wen-Hua Sun<sup>b,\*</sup>

<sup>a</sup> Beijing Key Laboratory of Clothing Materials R&D and Assessment, Beijing Engineering Research Center of Textile Nanofiber, School of Materials Science and Engineering, Beijing Institute of Fashion Technology, Beijing 100029, China. E-mail: zhangwj@bift.edu.cn.

<sup>b</sup> Key Laboratory of Engineering Plastics and Beijing National Laboratory for Molecular Science, Institute of Chemistry, Chinese Academy of Sciences, Beijing 100190, China. E-mail: whsun@iccas.ac.cn

<sup>c</sup> Department of Chemistry, University of Leicester, University Road, Leicester LE1 7RH, UK. E-mail: gas8@leicester.ac.uk.

| Table of Contents |                                                                                                                                                                                                                      | Pages     |
|-------------------|----------------------------------------------------------------------------------------------------------------------------------------------------------------------------------------------------------------------|-----------|
| 1.                | <sup>1</sup> H/ <sup>13</sup> C/ <sup>31</sup> P NMR spectra of <b>L1</b> - <b>L6</b> ( <b>Figures S1 – S17</b> )                                                                                                    | S2 – S10  |
| 2.                | <sup>1</sup> H/ <sup>13</sup> C/ <sup>31</sup> P NMR spectra of <b>Zn1</b> – <b>Zn7</b> ( <b>Figures S18 – S37</b> )                                                                                                 | S11 – S20 |
| 3                 | <b>Table SI-1</b> Comparison of the <sup>31</sup> P NMR chemical shifts for <b>L1</b> - <b>L5</b> with those in <b>Zn1</b> - <b>Zn5</b>                                                                              | S21       |
| 4.                | <b>Table SI-2</b> Ring opening polymerization of <i>rac</i> -LA and $\epsilon$ -CL using <b>Zn7</b>                                                                                                                  | S21       |
| 5.                | <sup>1</sup> H and <sup>31</sup> P NMR spectra of <b>Zn1</b> + 2LiCH <sub>2</sub> SiMe <sub>3</sub> ( <b>Figure S38</b> )                                                                                            | S22       |
| 6.                | <sup>1</sup> H NMR spectra of <b>Zn1</b> + 2LiN(SiMe <sub>3</sub> ) <sub>2</sub> ( <b>Figure S39</b> )                                                                                                               | S22       |
| 7                 | <sup>1</sup> H NMR spectra of the PCLs obtained using <b>Zn1</b> /2LiN(SiMe <sub>3</sub> ) <sub>2</sub> ([Zn]) with different quenching solvents ( <b>Figures S40 - S42</b> )                                        | S23, S24  |
| 8                 | <sup>1</sup> H NMR and MALDI-TOF spectra for the PCL produced with <b>Zn1</b> /2LiN(SiMe <sub>3</sub> ) <sub>2</sub> ([Zn]) using a CL:[Zn]:BnOH molar ratio of 4000:1:1 (run 14, Table 3 & <b>Figure S43</b> )      | S24, S25  |
| 9                 | <sup>1</sup> H NMR and MALDI-TOF mass spectra for the PCL produced with <b>Zn1</b> /2LiN(SiMe <sub>3</sub> ) <sub>2</sub> ([Zn]) using a CL:[Zn]:BnOH molar ratio of 5000:1:1 (run 15, Table 3 & <b>Figure S44</b> ) | S25, S26  |

1.  $^1\text{H}/^{13}\text{C}/^{31}\text{P}$  NMR spectra of L1 - L6 (Figures S1 – S17)

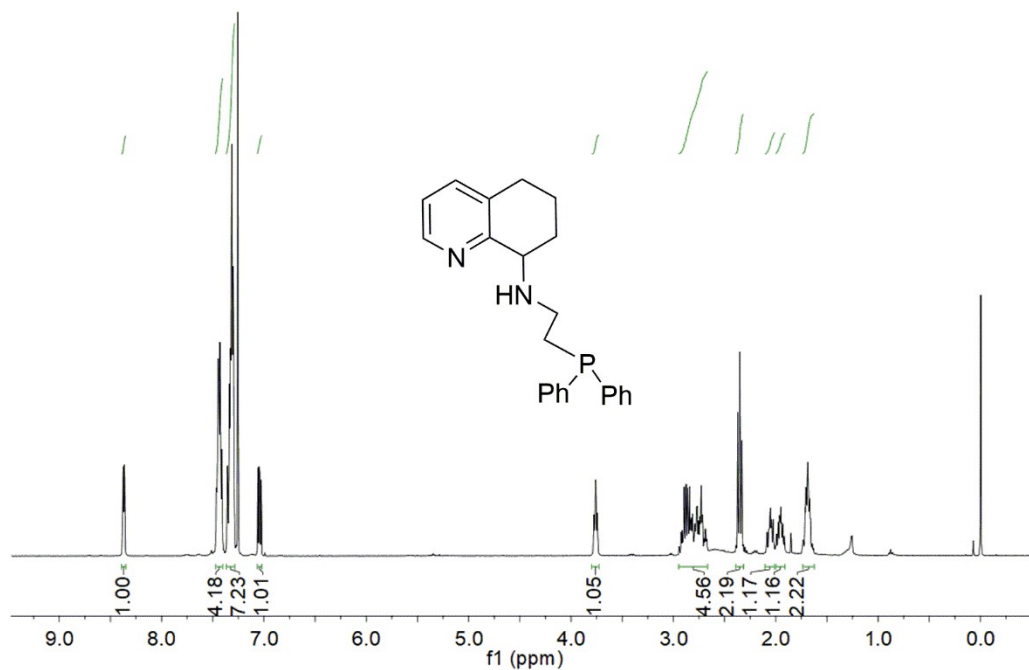

Figure S1(a)  $^1\text{H}$  NMR spectrum of L1; recorded in  $\text{CDCl}_3$  at 25 °C

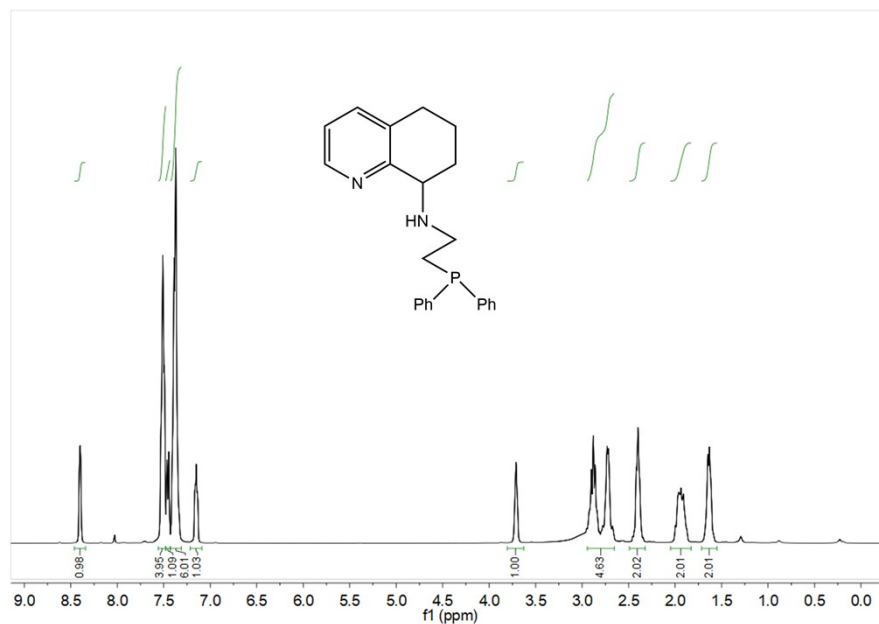

Figure S1(b)  $^1\text{H}$  NMR spectrum of L1; recorded in  $\text{C}_3\text{D}_7\text{NO}$  at 25 °C

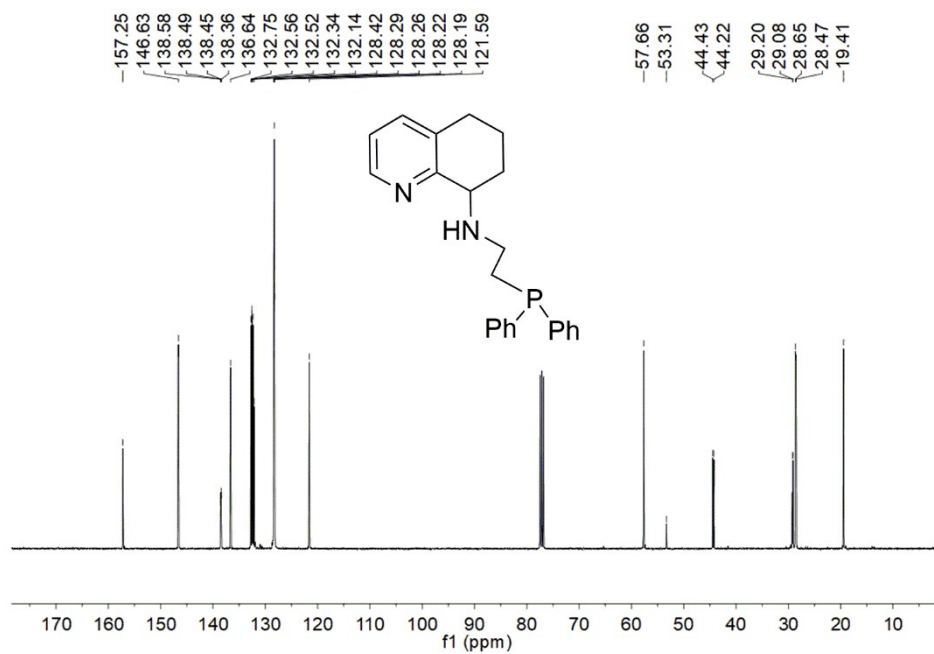

**Figure S2**  $^{13}\text{C}$  NMR spectrum of **L1**; recorded in  $\text{CDCl}_3$  at  $25\text{ }^\circ\text{C}$

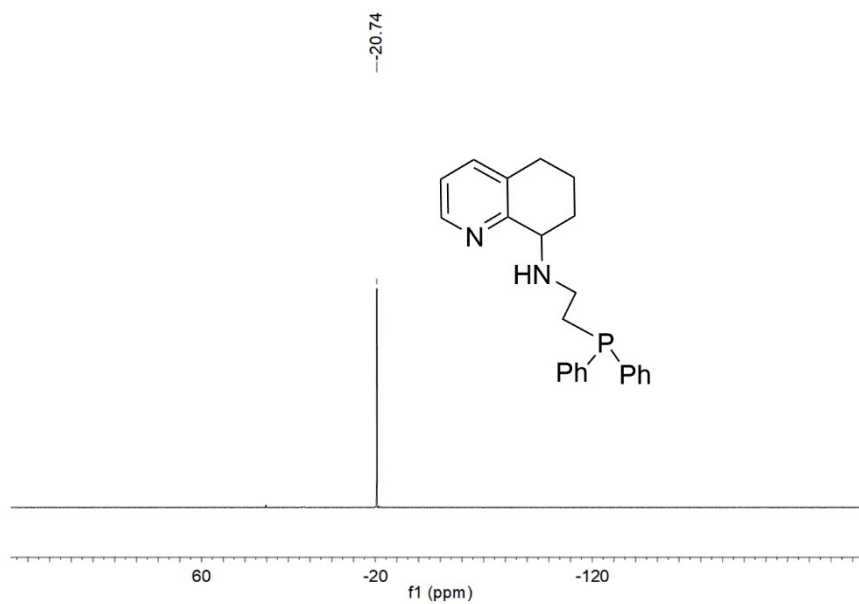

**Figure S3 (a)**  $^{31}\text{P}$  NMR spectrum of **L1**; recorded in  $\text{CDCl}_3$  at  $25\text{ }^\circ\text{C}$

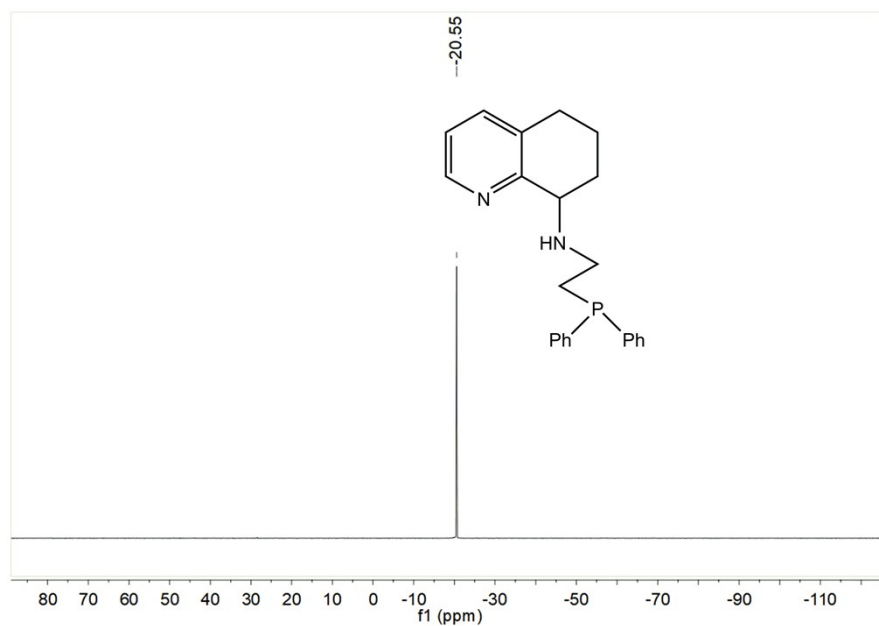

**Figure S3(b)**  $^{31}\text{P}$  NMR spectrum of **L1**; recorded in  $\text{C}_3\text{D}_7\text{NO}$  at 25 °C

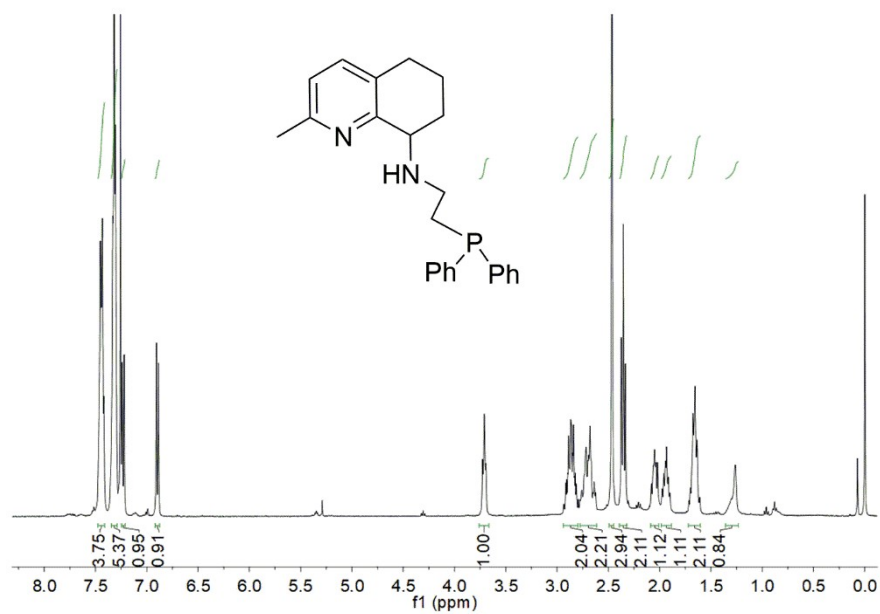

**Figure S4(a)**  $^1\text{H}$  NMR spectrum of **L2**; recorded in  $\text{CDCl}_3$  at 25 °C

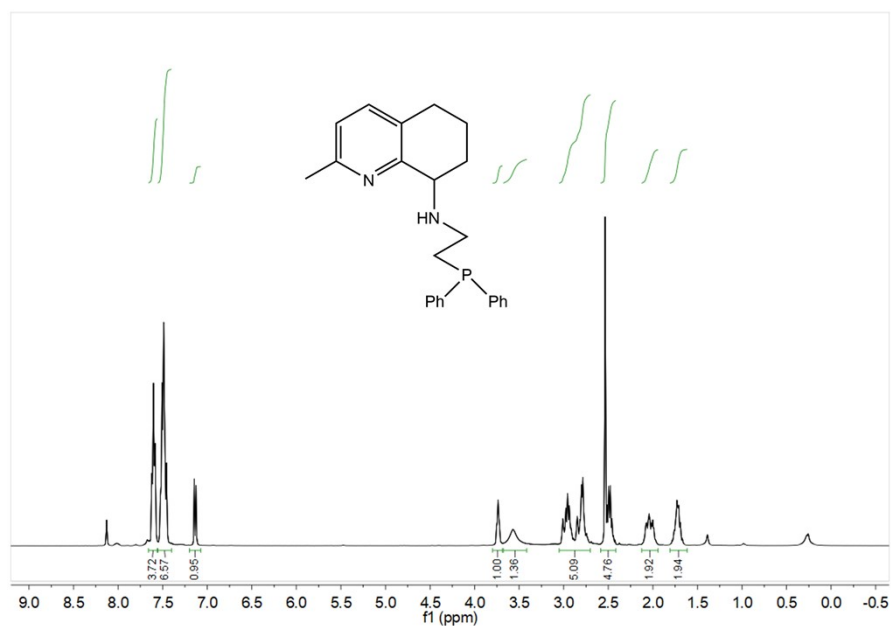

**Figure S4 (b)**  $^1\text{H}$  NMR spectrum of L2; recorded in  $\text{C}_3\text{D}_7\text{NO}$  at  $25^\circ\text{C}$

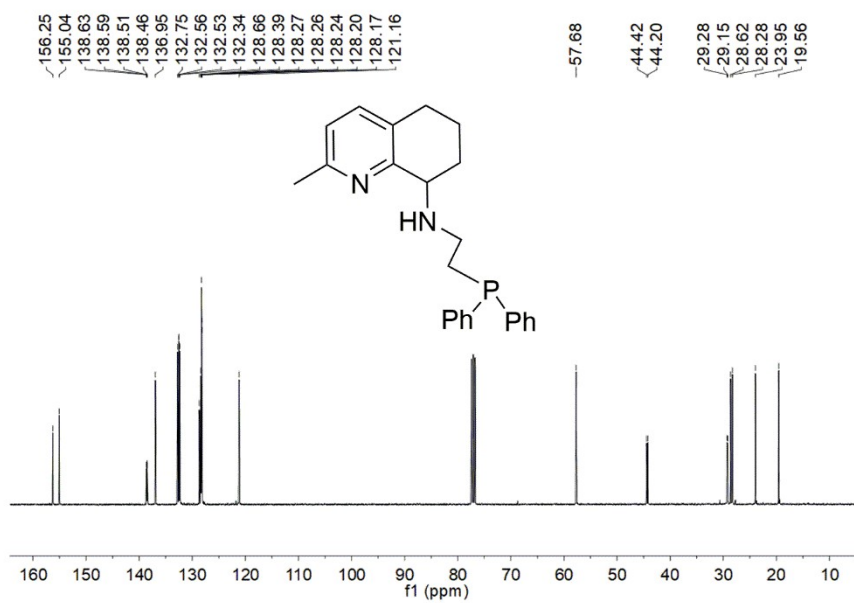

**Figure S5**  $^{13}\text{C}$  NMR spectrum of L2; recorded in  $\text{CDCl}_3$  at  $25^\circ\text{C}$

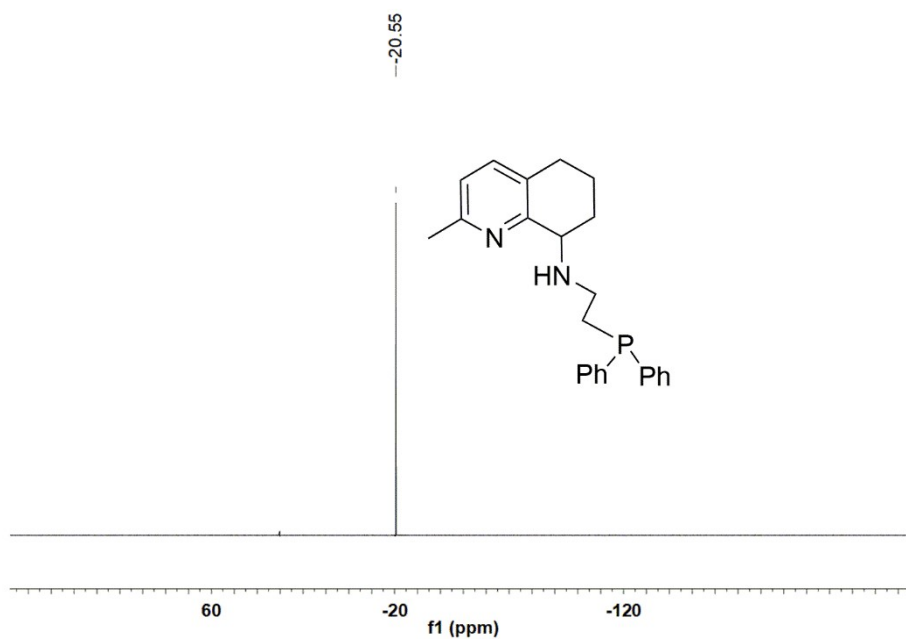

**Figure S6 (a)**  $^{31}\text{P}$  NMR spectrum of L2; recorded in  $\text{CDCl}_3$  at 25 °C

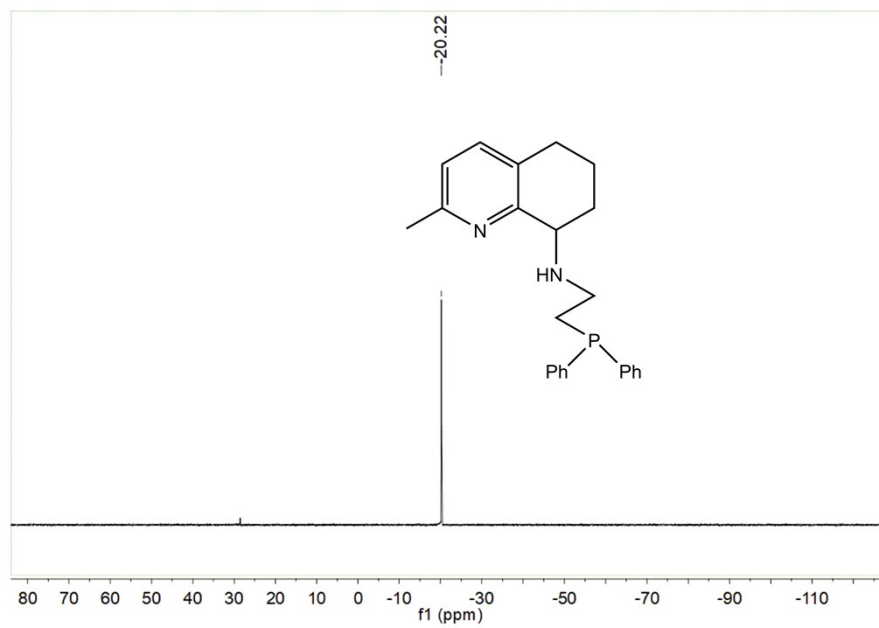

**Figure S6 (b)**  $^{31}\text{P}$  NMR spectrum of L2; recorded in  $\text{C}_3\text{D}_7\text{NO}$  at 25 °C

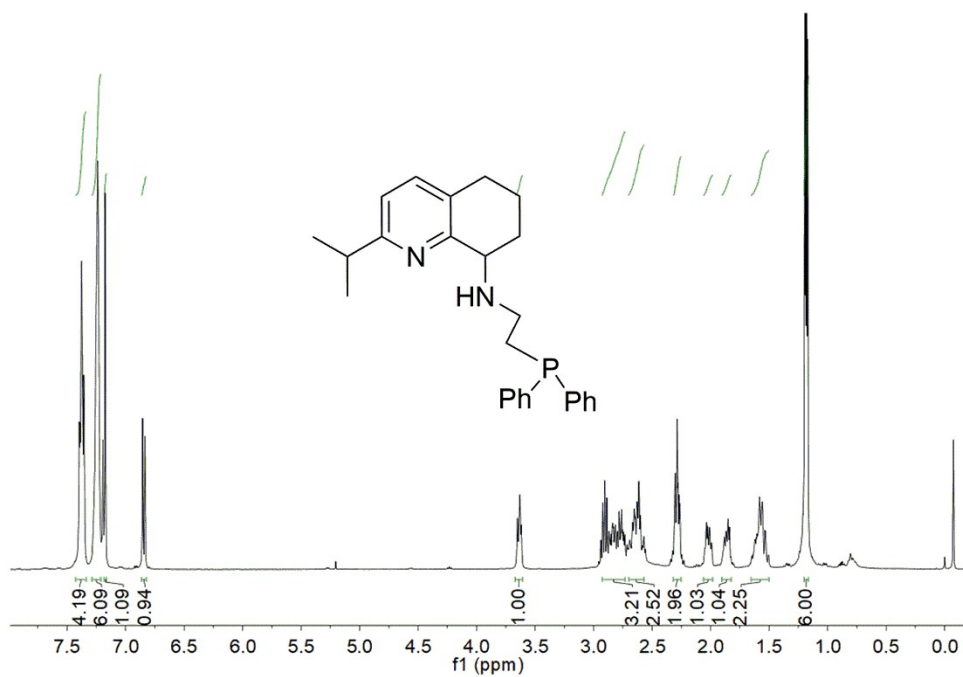

**Figure S7(a)** <sup>1</sup>H NMR spectrum of L3; recorded in CDCl<sub>3</sub> at 25 °C

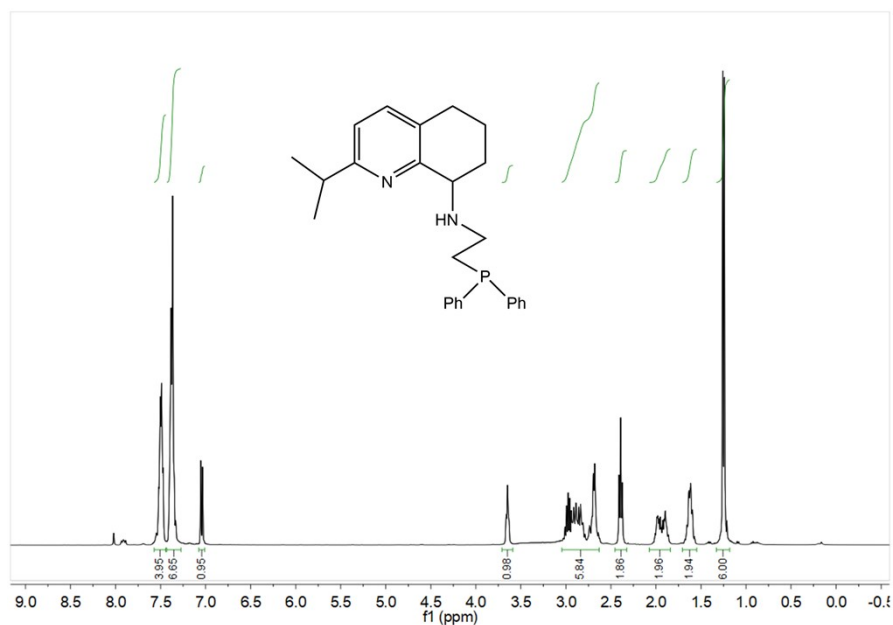

**Figure S7 (b)** <sup>1</sup>H NMR spectrum of L3; recorded in C<sub>3</sub>D<sub>7</sub>NO at 25 °C

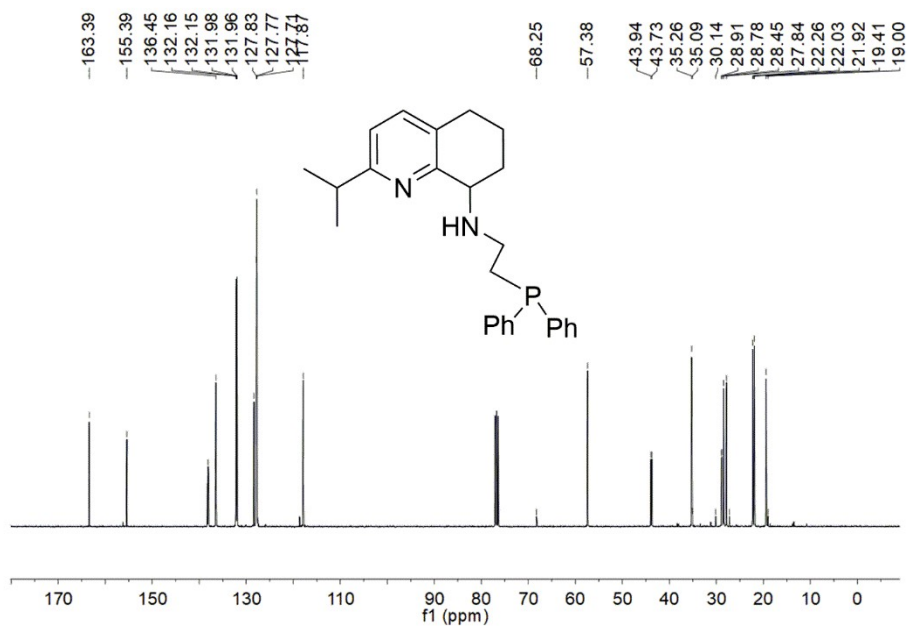

**Figure S8** <sup>13</sup>C NMR spectrum of **L3**; recorded in CDCl<sub>3</sub> at 25 °C

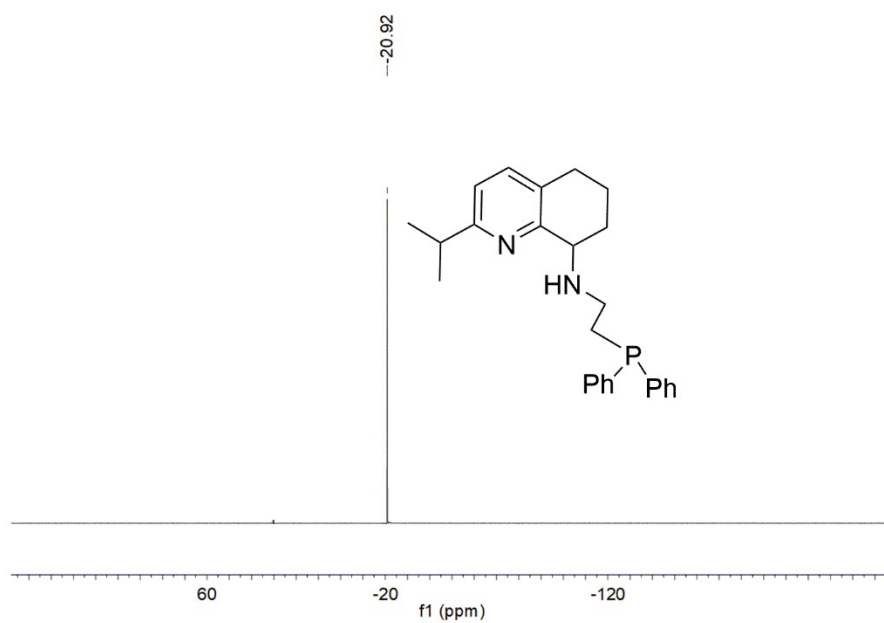

**Figure S9(a)** <sup>31</sup>P NMR spectrum of **L3**; recorded in CDCl<sub>3</sub> at 25 °C



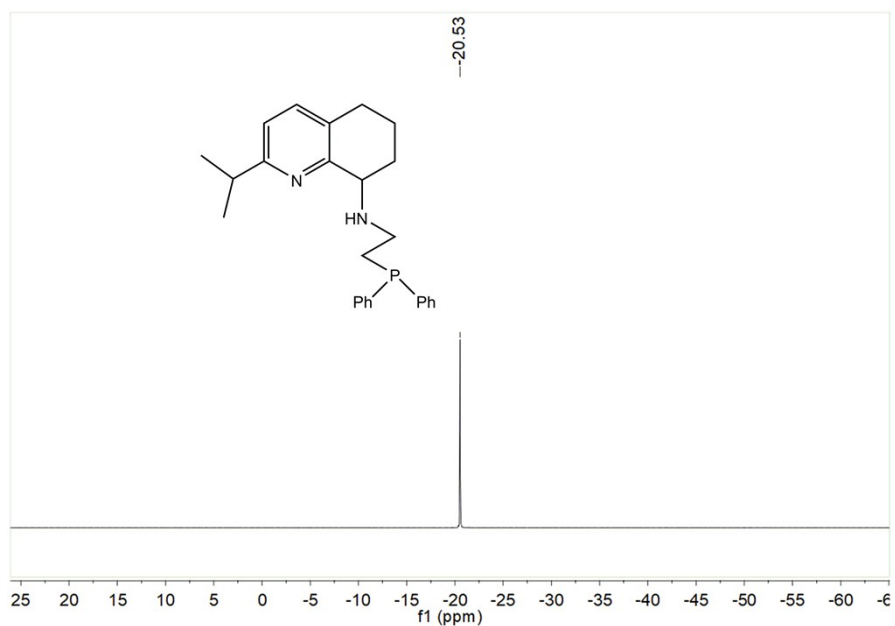

**Figure S9 (b)**  $^{31}\text{P}$  NMR spectrum of L3; recorded in  $\text{C}_3\text{D}_7\text{NO}$  at 25 °C

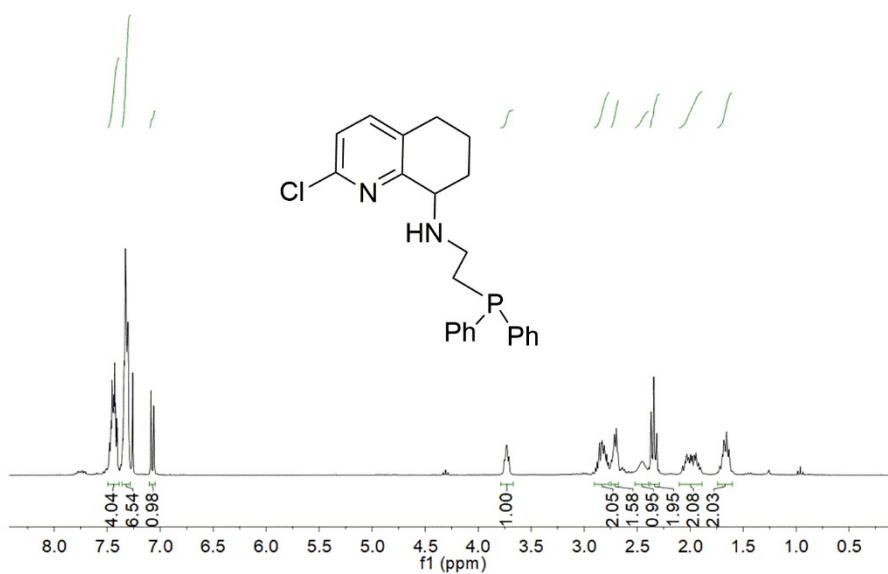

**Figure S10(a)**  $^1\text{H}$  NMR spectrum of L4; recorded in  $\text{CDCl}_3$  at 25 °C

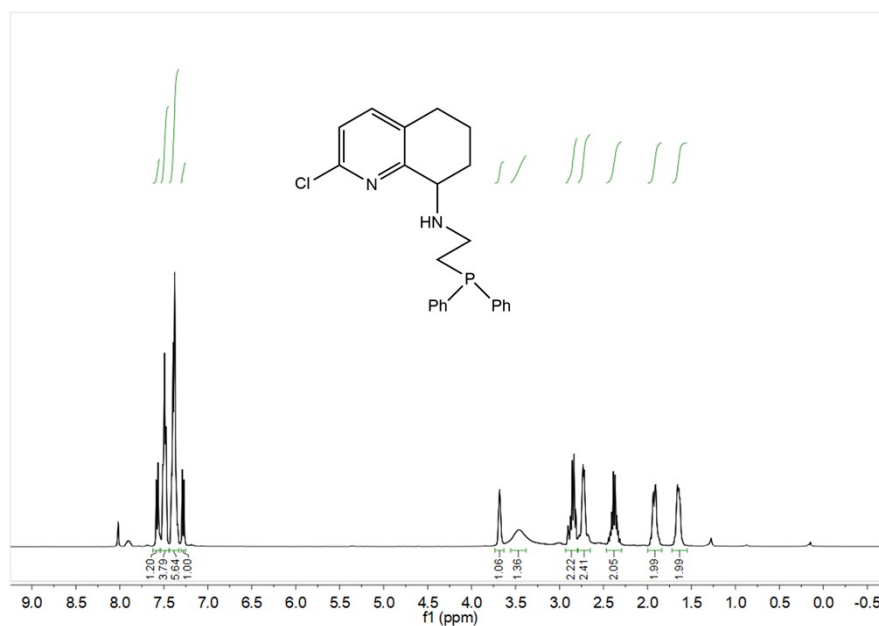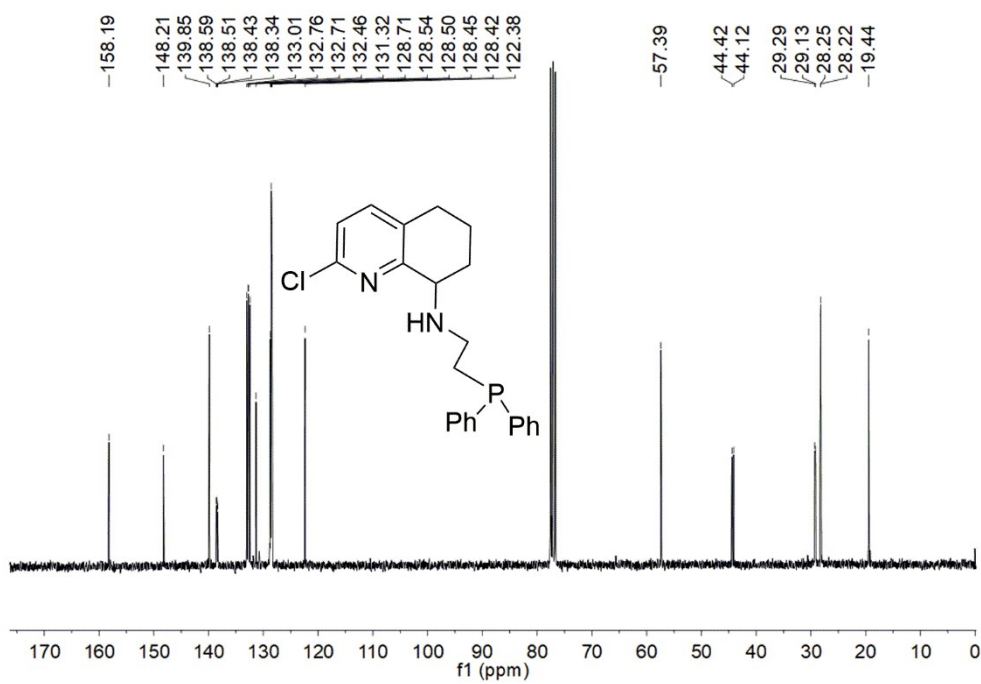

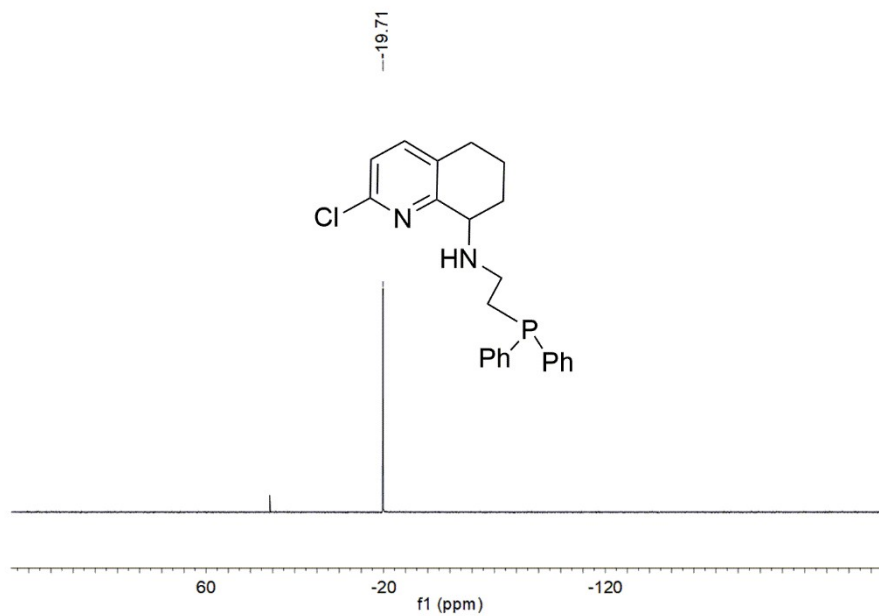

**Figure S12(a)**  $^{31}\text{P}$  NMR spectrum of **L4**; recorded in  $\text{CDCl}_3$  at 25 °C

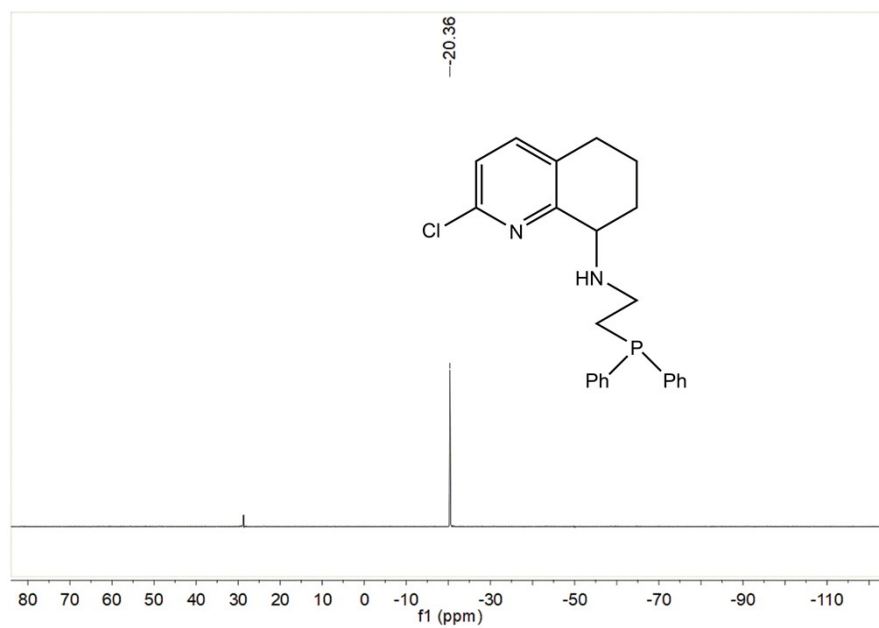

**Figure S12 (b)**  $^{31}\text{P}$  NMR spectrum of **L4**; recorded in  $\text{C}_3\text{D}_7\text{NO}$  at 25 °C

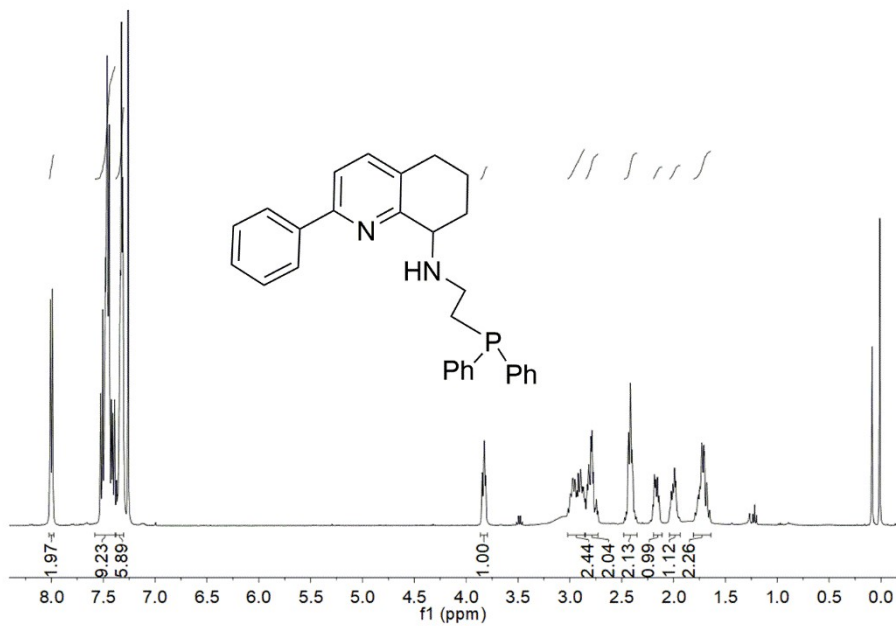

**Figure S13(a)**  $^1\text{H}$  NMR spectrum of L5; recorded in  $\text{CDCl}_3$  at 25 °C

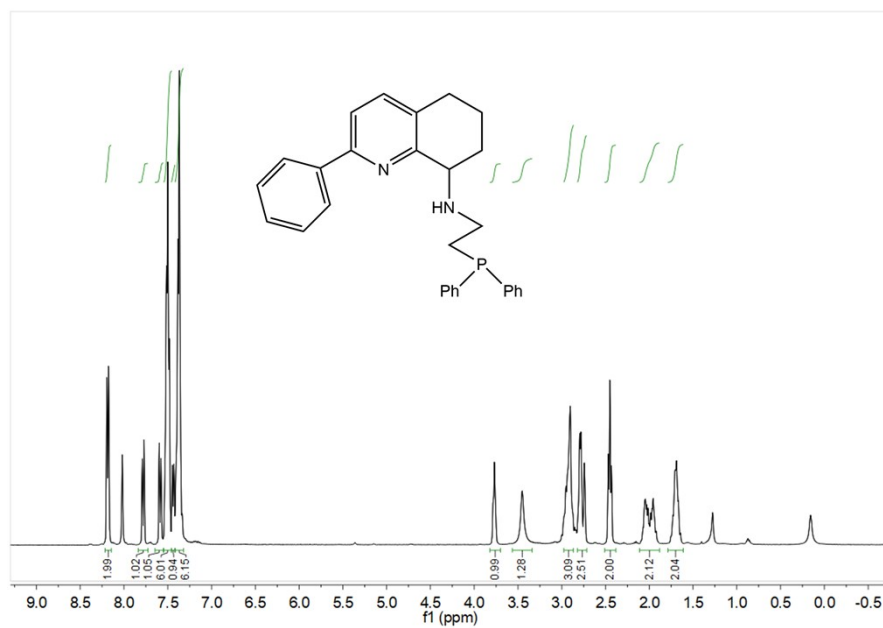

**Figure S13 (b)**  $^1\text{H}$  NMR spectrum of L5; recorded in  $\text{C}_3\text{D}_7\text{NO}$  at 25 °C

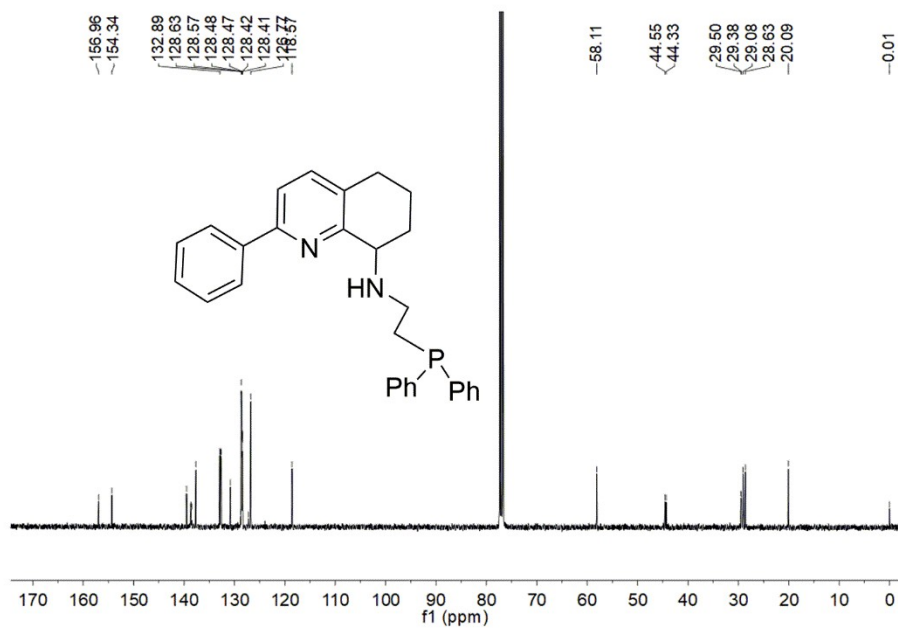

**Figure S14** <sup>13</sup>C NMR spectrum of **L5**; recorded in CDCl<sub>3</sub> at 25 °C

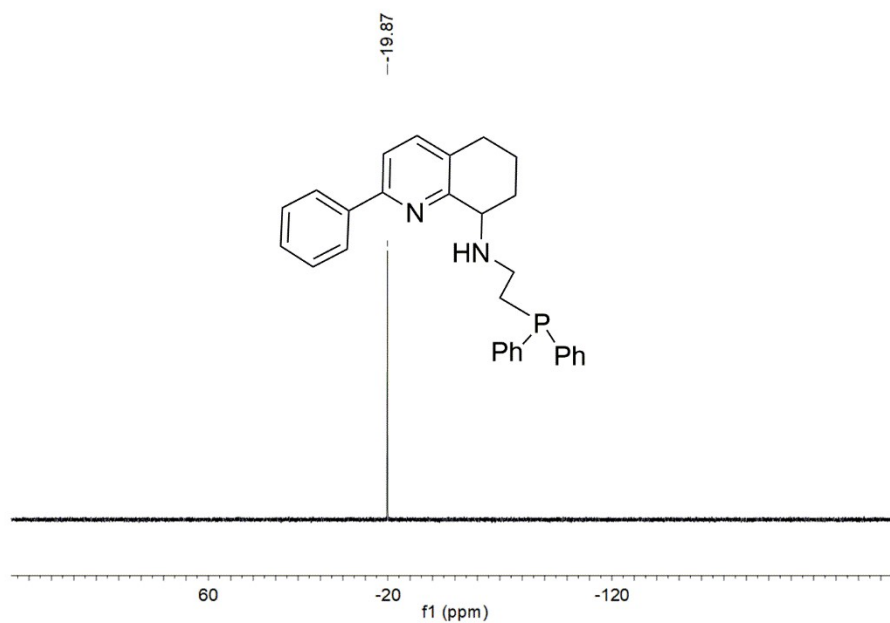

**Figure S15(a)** <sup>31</sup>P NMR spectrum of **L5**; recorded in CDCl<sub>3</sub> at 25 °C

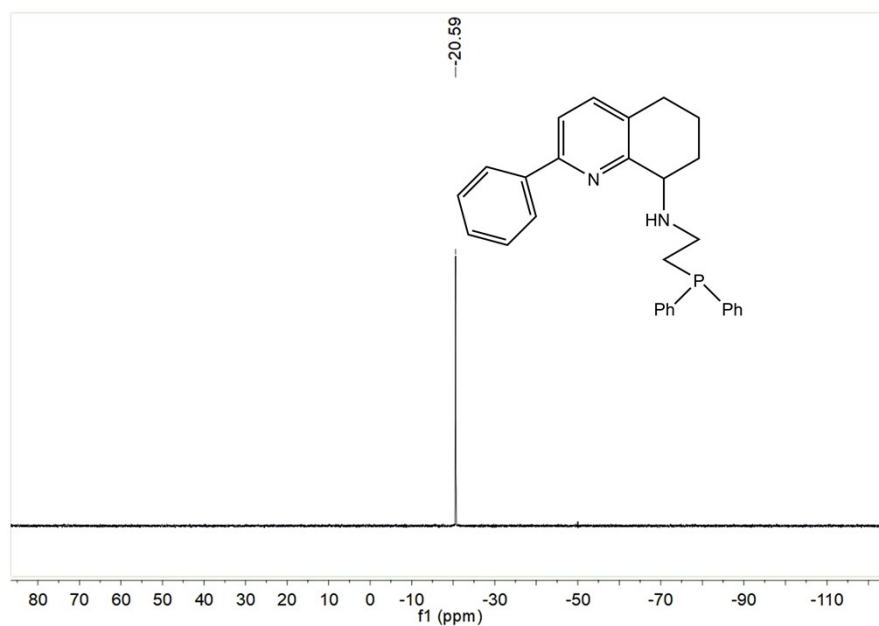

**Figure S15 (b)**  $^{31}\text{P}$  NMR spectrum of **L5**; recorded in  $\text{C}_3\text{D}_7\text{NO}$  at 25 °C

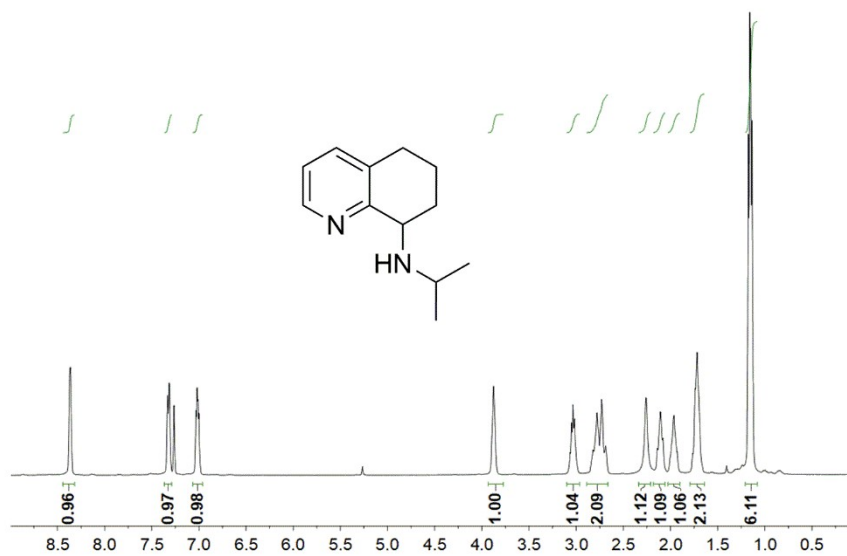

**Figure S16**  $^1\text{H}$  NMR spectrum of **L6**; recorded in  $\text{CDCl}_3$  at 25 °C

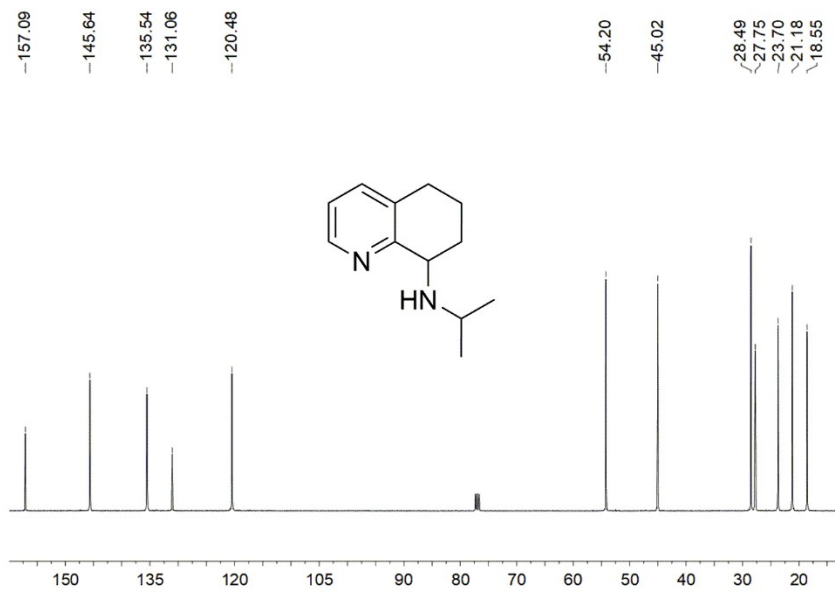

**Figure S17**  $^{13}\text{C}$  NMR spectrum of **L6**; recorded in  $\text{CDCl}_3$  at 25 °C

## 2. $^1\text{H}/^{13}\text{C}/^{31}\text{P}$ NMR spectra of Zn1 – Zn7 (Figures S18 – S37)

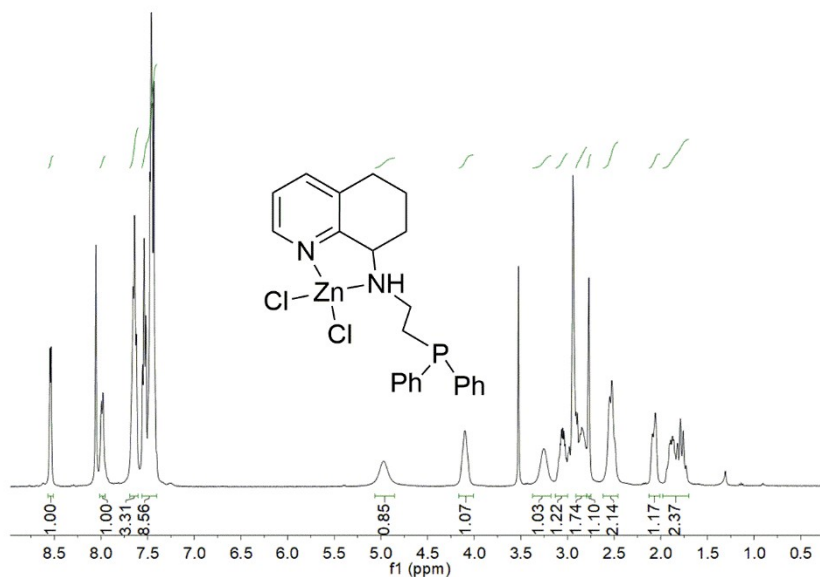

**Figure S18**  $^1\text{H}$  NMR spectrum of **Zn1**; recorded in  $\text{C}_3\text{D}_7\text{NO}$  at 25 °C

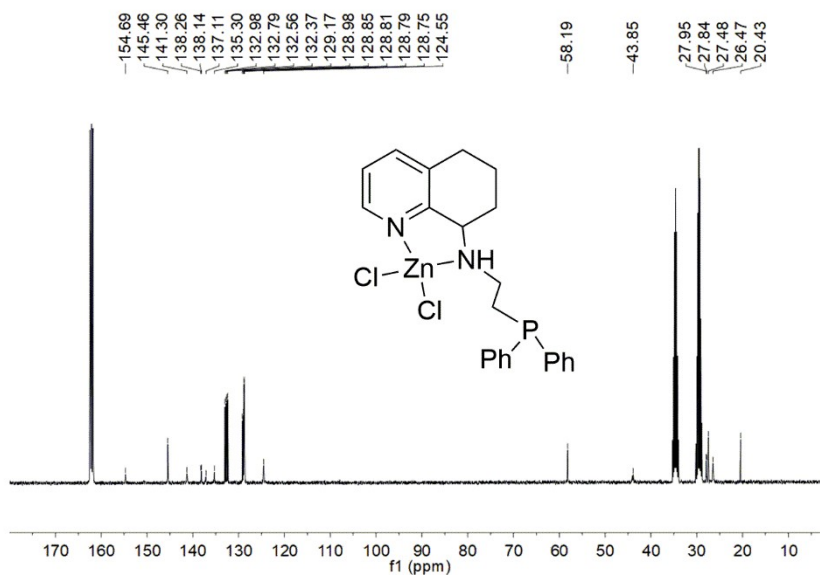

**Figure S19**  $^{13}\text{C}$  NMR spectrum of **Zn1**; recorded in  $\text{C}_3\text{D}_7\text{NO}$  at 25 °C



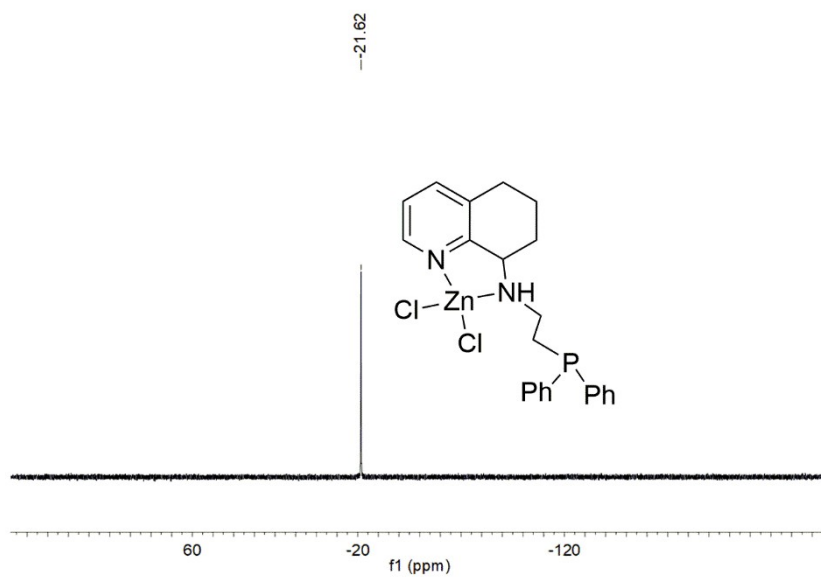

**Figure S20**  $^{31}\text{P}$  NMR spectrum of **Zn1**; recorded in  $\text{C}_3\text{D}_7\text{NO}$  at 25 °C

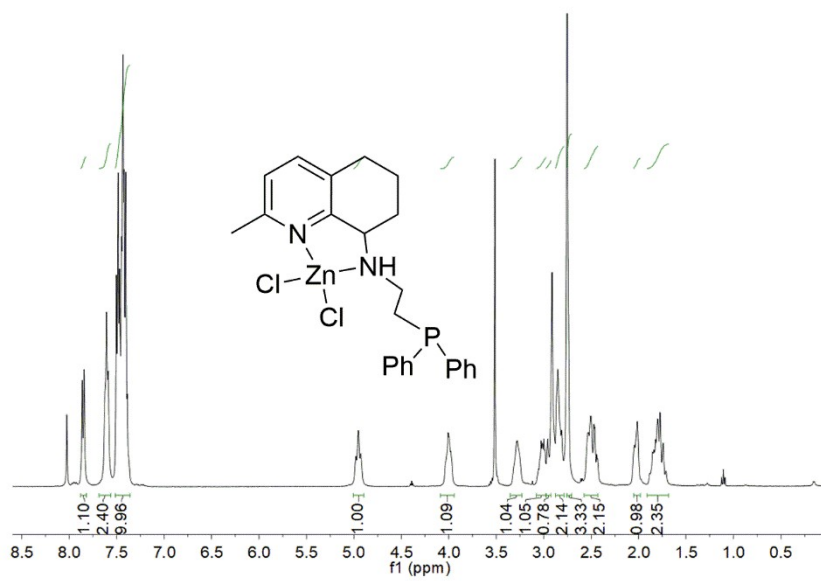

**Figure S21**  $^1\text{H}$  NMR spectrum of **Zn2**; recorded in  $\text{C}_3\text{D}_7\text{NO}$  at 25 °C

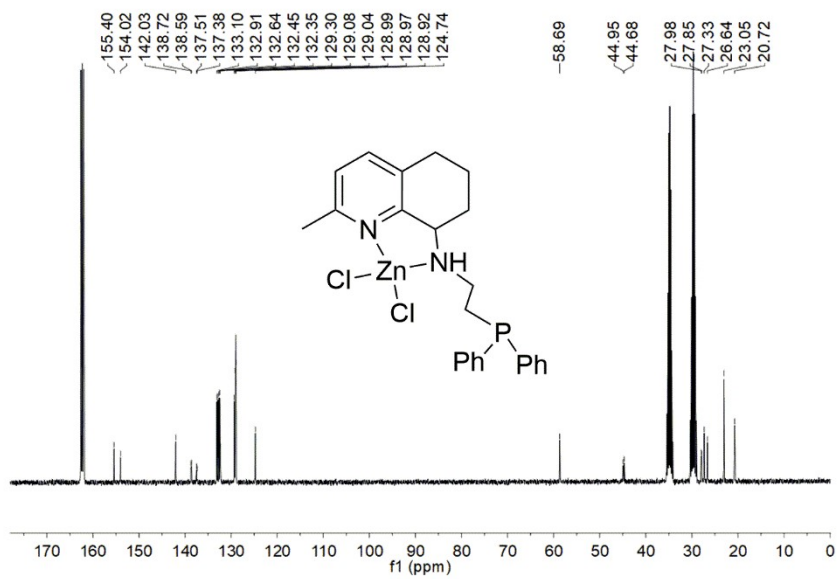

**Figure S22**  $^{13}\text{C}$  NMR spectrum of **Zn2**; recorded in  $\text{C}_3\text{D}_7\text{NO}$  at  $25^\circ\text{C}$

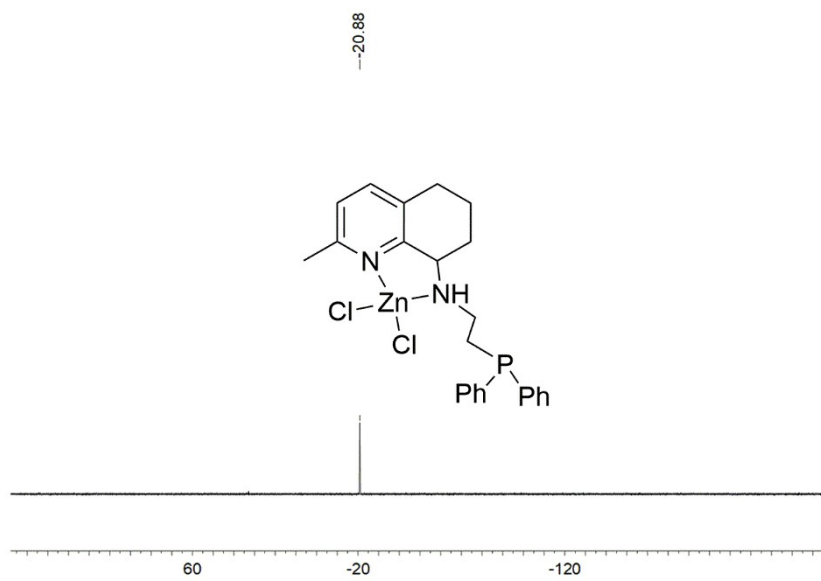

**Figure S23**  $^{31}\text{P}$  NMR spectrum of **Zn2**; recorded in  $\text{C}_3\text{D}_7\text{NO}$  at  $25^\circ\text{C}$

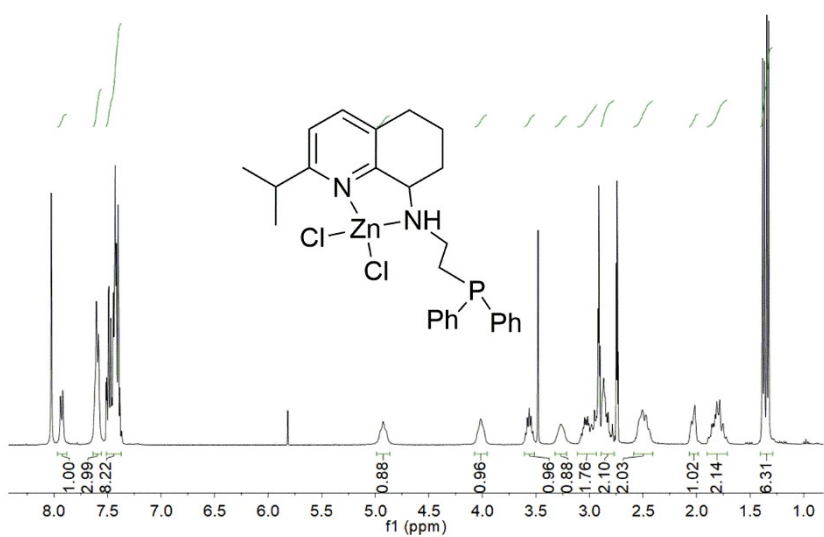

**Figure S24** <sup>1</sup>H NMR spectrum of **Zn3**; recorded in C<sub>3</sub>D<sub>7</sub>NO at 25 °C

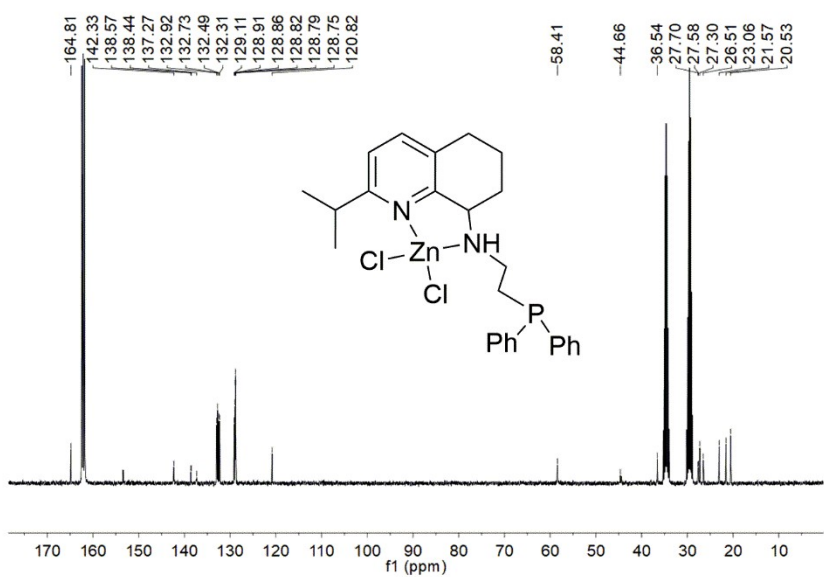

**Figure S25** <sup>13</sup>C NMR spectrum of **Zn3**; recorded in C<sub>3</sub>D<sub>7</sub>NO at 25 °C

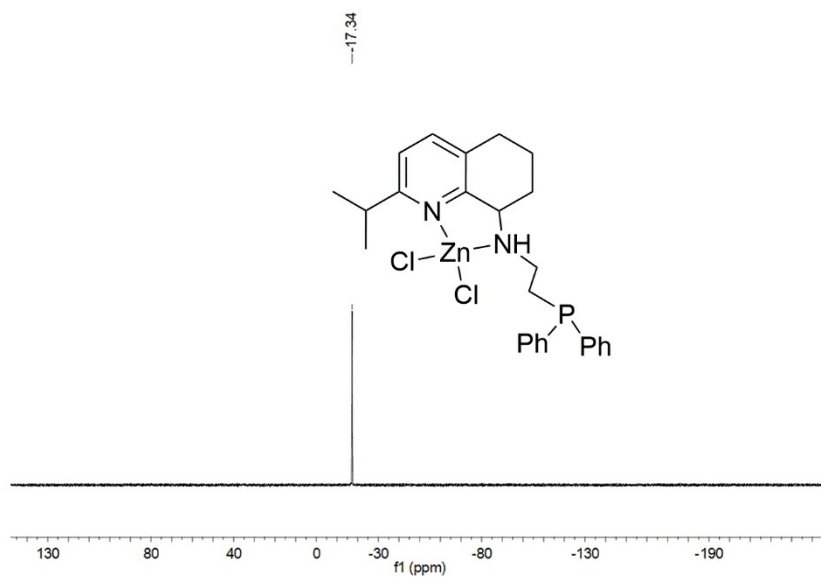

**Figure S26**  $^{31}\text{P}$  NMR spectrum of **Zn3**; recorded in  $\text{C}_3\text{D}_7\text{NO}$  at 25 °C

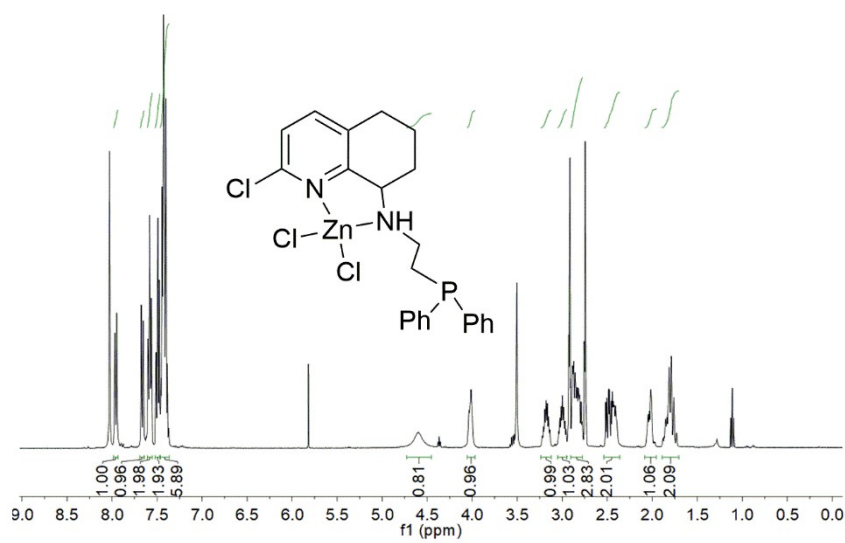

**Figure S27**  $^1\text{H}$  NMR spectrum of **Zn4**; recorded in  $\text{C}_3\text{D}_7\text{NO}$  at 25 °C

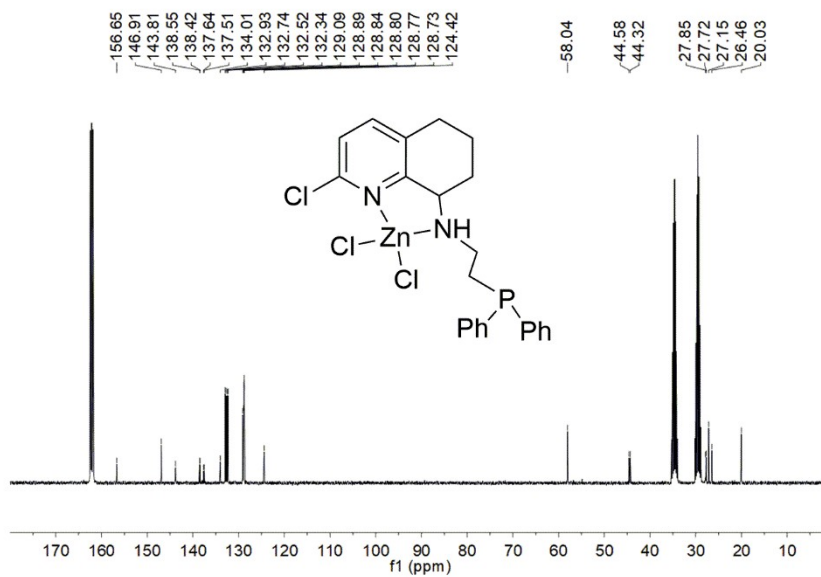

**Figure S28** <sup>13</sup>C NMR spectrum of **Zn4**; recorded in C<sub>3</sub>D<sub>7</sub>NO at 25 °C

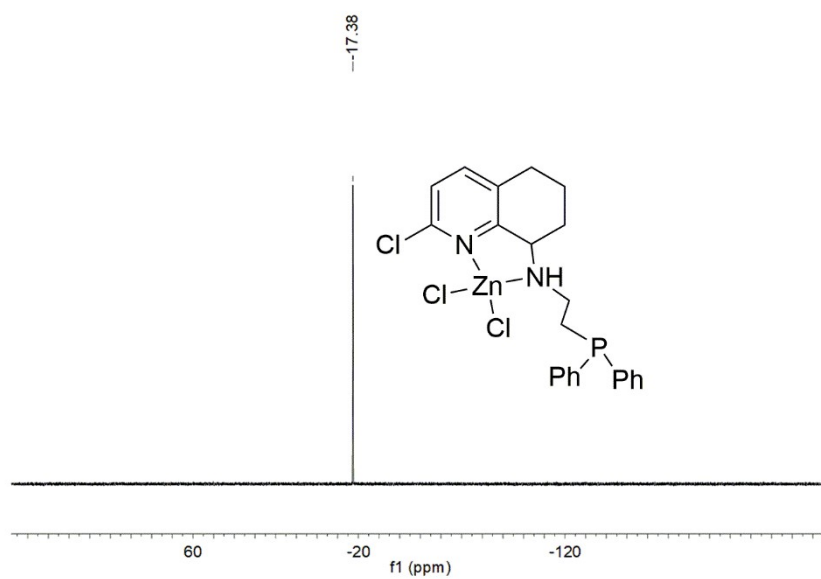

**Figure S29** <sup>31</sup>P NMR spectrum of **Zn4**; recorded in C<sub>3</sub>D<sub>7</sub>NO at 25 °C

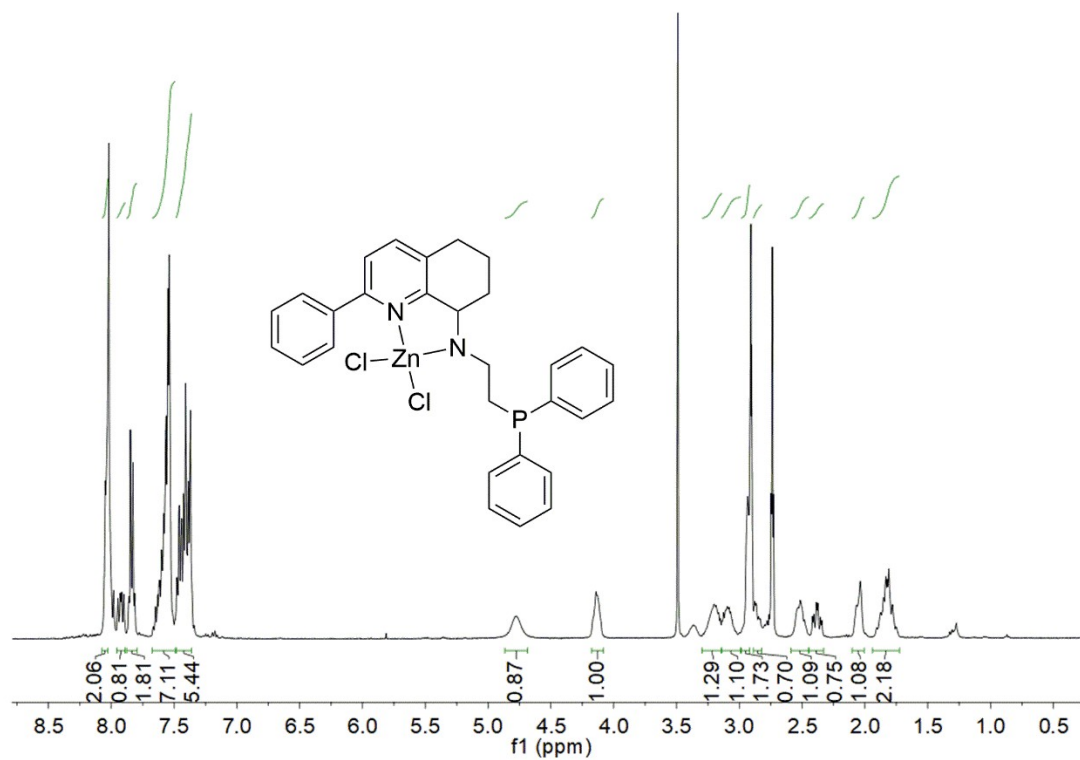

**Figure S30** <sup>1</sup>H NMR spectrum of **Zn5**; recorded in C<sub>3</sub>D<sub>7</sub>NO at 25 °C

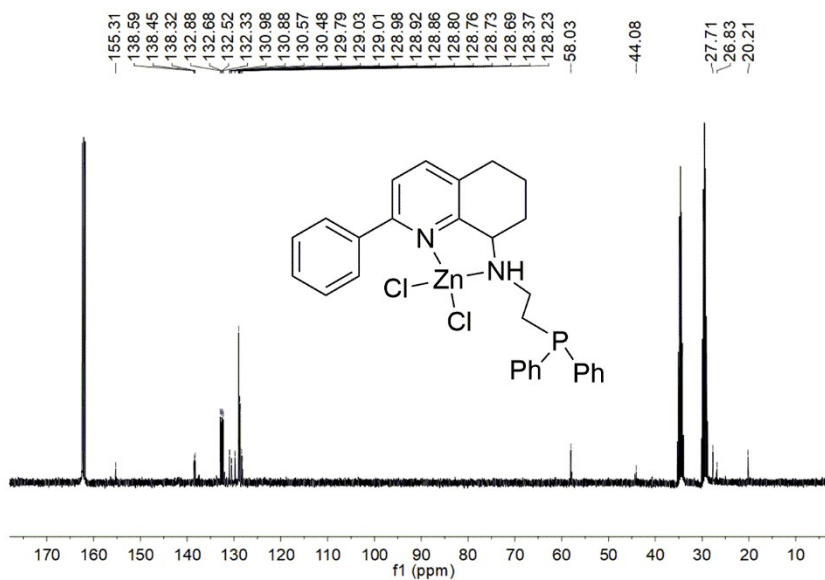

**Figure S31** <sup>13</sup>C NMR spectrum of **Zn5**; recorded in C<sub>3</sub>D<sub>7</sub>NO at 25 °C

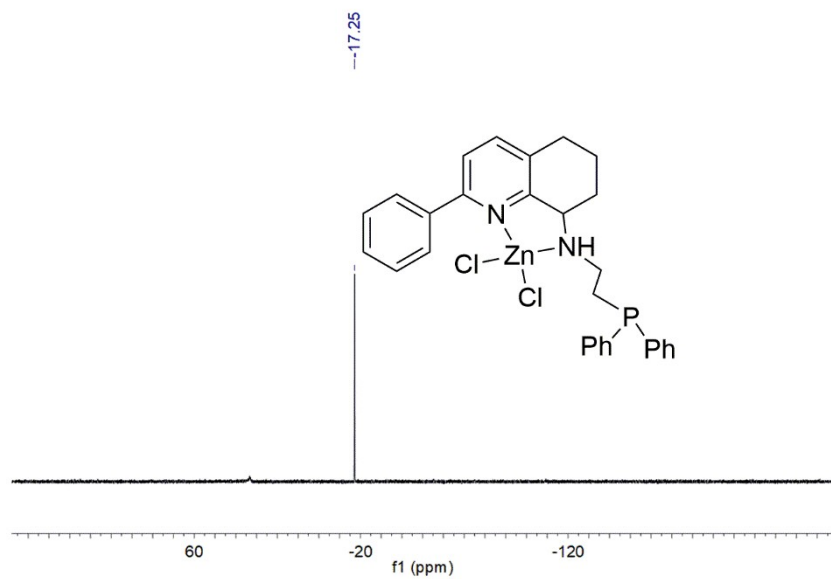

**Figure S32**  $^{31}\text{P}$  NMR spectrum of **Zn5**; recorded in  $\text{C}_3\text{D}_7\text{NO}$  at 25 °C

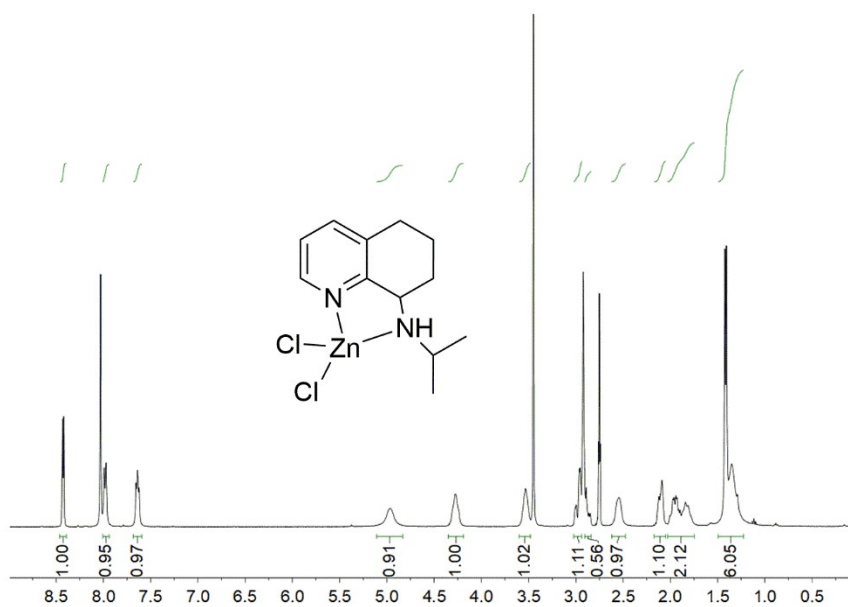

**Figure S33**  $^1\text{H}$  NMR spectrum of **Zn6**; recorded in  $\text{C}_3\text{D}_7\text{NO}$  at 25 °C

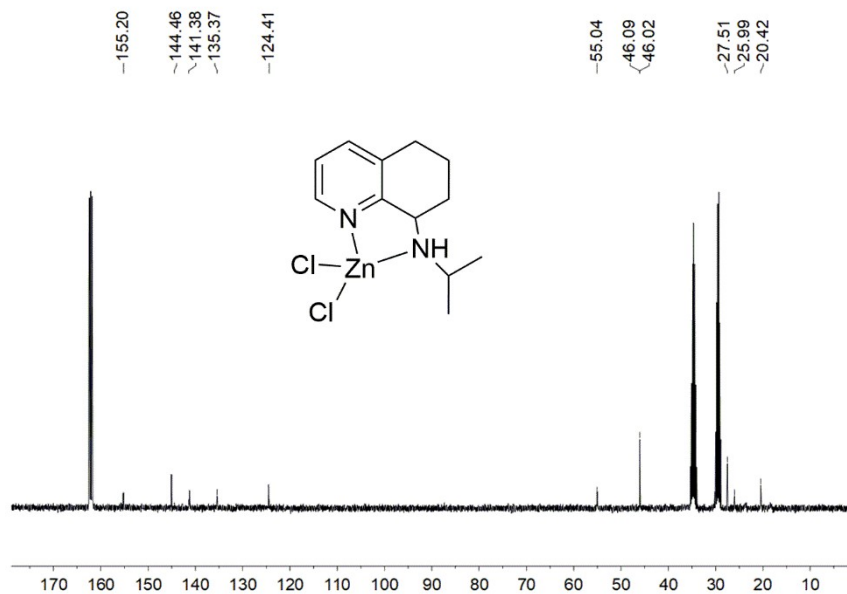

**Figure S34** <sup>13</sup>C NMR spectrum of **Zn6**; recorded in C<sub>3</sub>D<sub>7</sub>NO at 25 °C

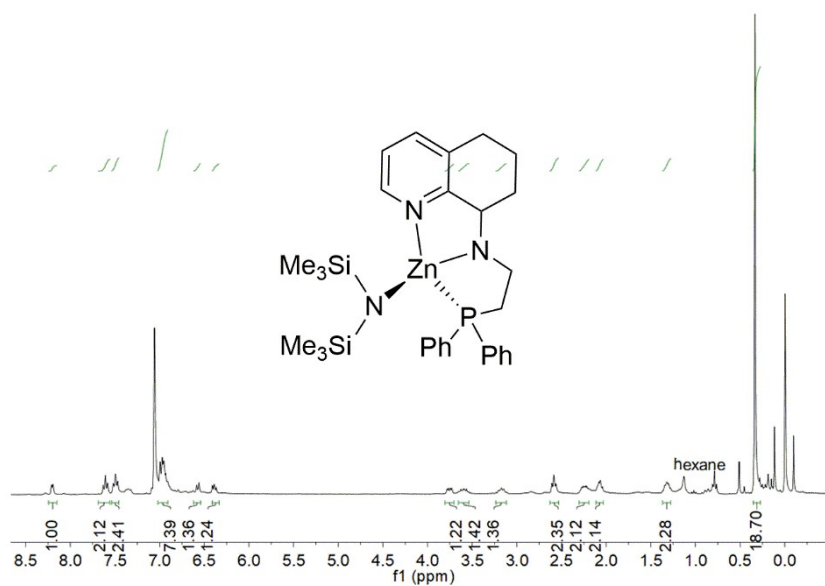

**Figure S35** <sup>1</sup>H NMR spectrum of **Zn7**; recorded in C<sub>6</sub>D<sub>6</sub> at 25 °C



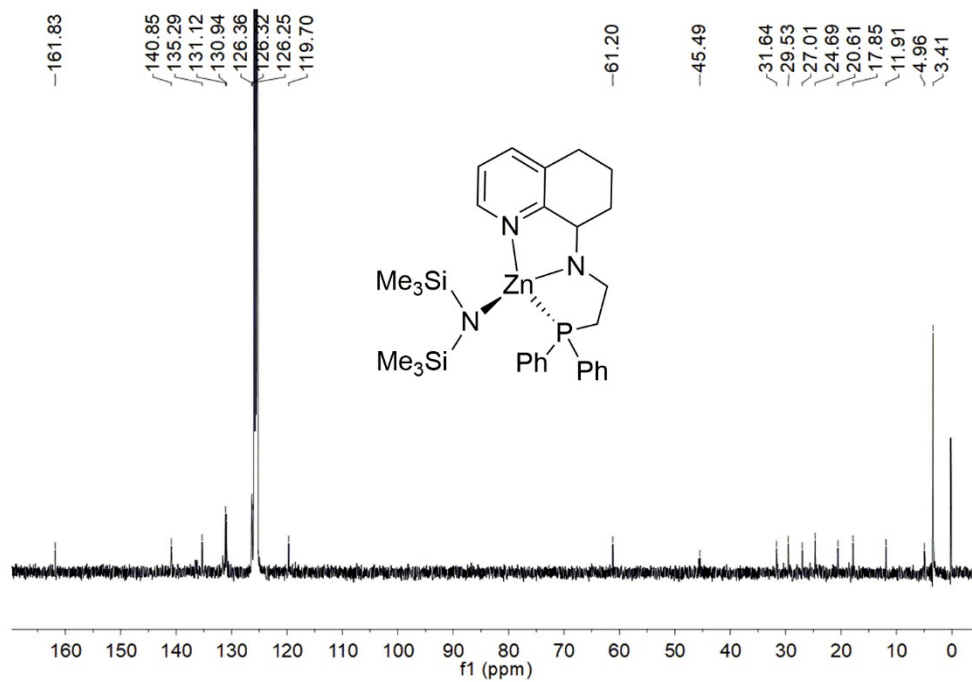

**Figure S36** <sup>13</sup>C NMR spectrum of **Zn7**; recorded in C<sub>6</sub>D<sub>6</sub> at 25 °C

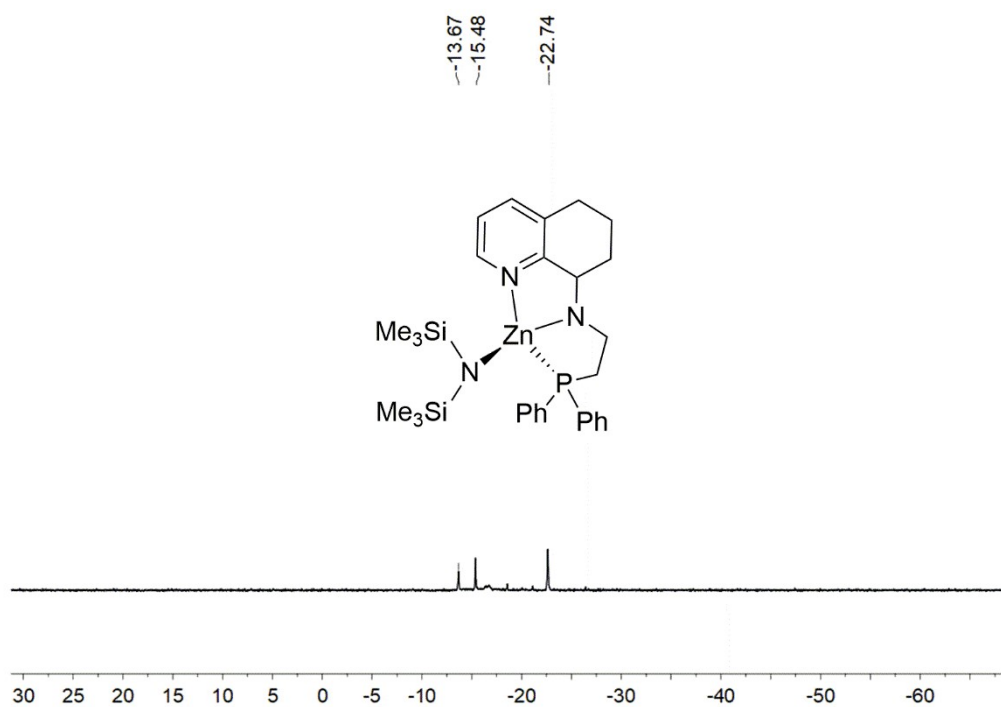

**Figure S37** <sup>31</sup>P NMR spectrum of **Zn7**; recorded in C<sub>6</sub>D<sub>6</sub> at 25 °C

**3. Table SI-1** Comparison of the  $^{31}\text{P}$  NMR chemical shifts for **L1 - L5** with those in **Zn1 - Zn5**

| Compound        | $^{31}\text{P}$ NMR<br>chemical shift<br>(ppm, in $\text{CDCl}_3$ ) | $^{31}\text{P}$ NMR<br>chemical shift<br>(ppm, in $d_7$ -DMF) | Complex    | $^{31}\text{P}$ NMR chemical<br>shift (ppm, in $d_7$ -<br>DMF ) |
|-----------------|---------------------------------------------------------------------|---------------------------------------------------------------|------------|-----------------------------------------------------------------|
| <b>L1</b> (H)   | -20.74                                                              | -20.55                                                        | <b>Zn1</b> | -21.62                                                          |
| <b>L2</b> (Me)  | -20.55                                                              | -20.22                                                        | <b>Zn2</b> | -20.88                                                          |
| <b>L3</b> (iPr) | -20.92                                                              | -20.53                                                        | <b>Zn3</b> | -17.34                                                          |
| <b>L4</b> (Cl)  | -19.71                                                              | -20.36                                                        | <b>Zn4</b> | -17.38                                                          |
| <b>L5</b> (Ph)  | -19.87                                                              | -20.59                                                        | <b>Zn5</b> | -17.25                                                          |

**Table SI-2** Ring opening polymerization of *rac*-LA and  $\epsilon$ -CL using **Zn7**<sup>a</sup>

| Entry | Monomer        | [monomer]/[Zn] | t<br>(min) | T<br>( $^{\circ}\text{C}$ ) | Conv.<br>(%) <sup>b</sup> |
|-------|----------------|----------------|------------|-----------------------------|---------------------------|
| 1     | <i>rac</i> -LA | 250:1          | 30         | 50                          | 99                        |
| 2     | <i>rac</i> -LA | 500:1          | 30         | 50                          | 98                        |
| 3     | <i>rac</i> -LA | 1000:1         | 30         | 50                          | 93                        |
| 4     | $\epsilon$ -CL | 1000:1         | 120        | 50                          | 0                         |

Conditions: 10  $\mu\text{mol}$  zinc procatalyst 1.0 mL toluene; <sup>b</sup> Determined by  $^1\text{H}$  NMR spectroscopy.

5.  $^1\text{H}$  and  $^{31}\text{P}$  NMR spectra of **Zn1** +  $2\text{LiCH}_2\text{SiMe}_3$  (Figure S38)

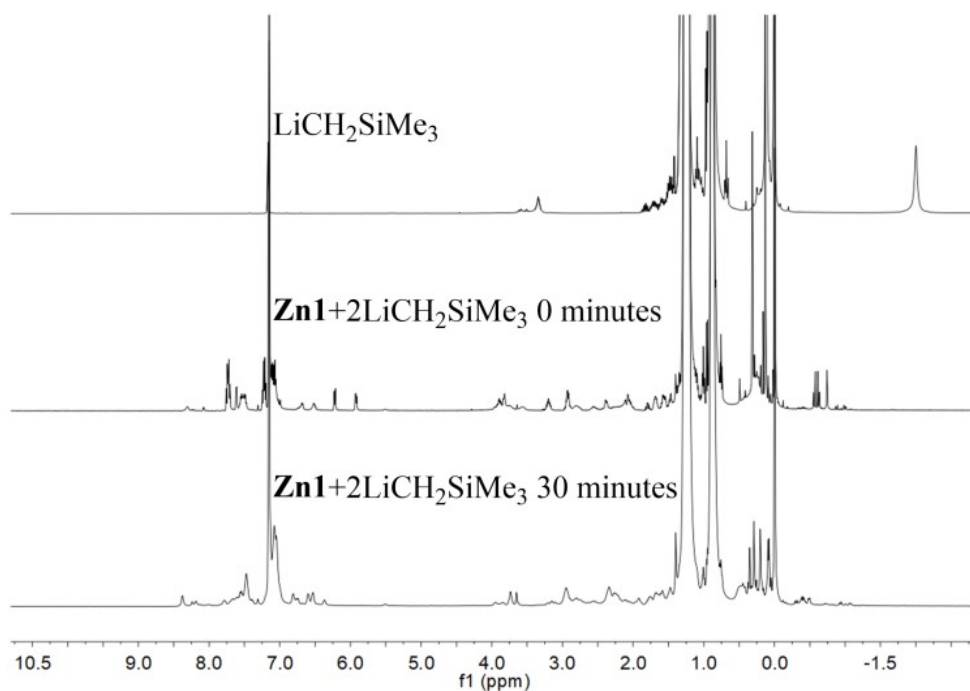

**Figure S38a** Stacked  $^1\text{H}$  NMR spectra of  $\text{LiCH}_2\text{SiMe}_3$  (top), **Zn1**+ $2\text{LiCH}_2\text{SiMe}_3$  after 0 minutes (middle) and **Zn1**+ $2\text{LiCH}_2\text{SiMe}_3$  after 30 minutes (bottom); all spectra recorded in  $\text{C}_6\text{D}_6$  at  $25\text{ }^\circ\text{C}$

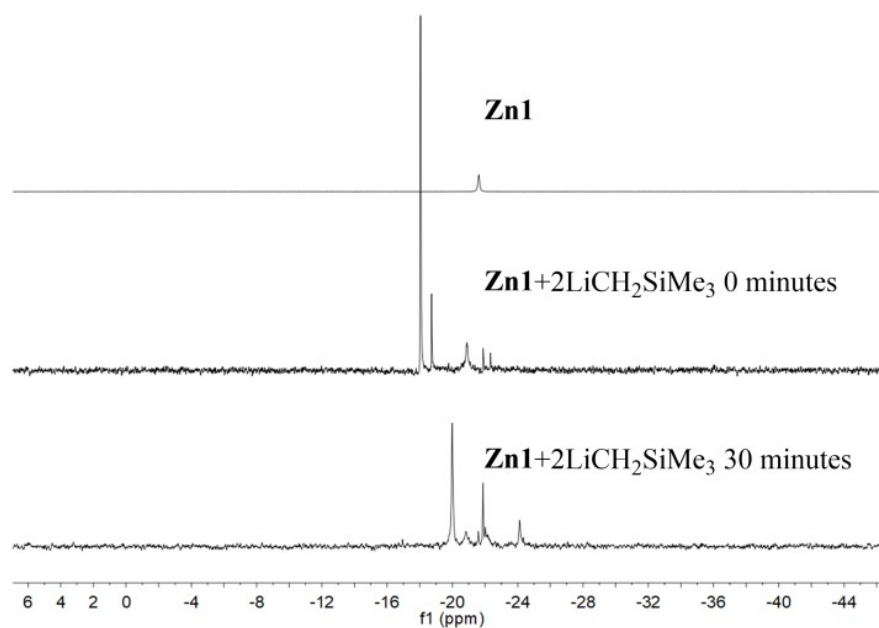

**Figure S38b** Stacked  $^{31}\text{P}$  NMR spectra of **Zn1** (top), **Zn1**+ $2\text{LiCH}_2\text{SiMe}_3$  after 0 minutes (middle) and **Zn1**+ $2\text{LiCH}_2\text{SiMe}_3$  after 30 minutes (bottom); all spectra recorded in  $\text{C}_6\text{D}_6$  at  $25\text{ }^\circ\text{C}$

## 6. $^1\text{H}$ NMR spectra of $\text{Zn1} + 2\text{LiN}(\text{SiMe}_3)_2$ (Figure S39)

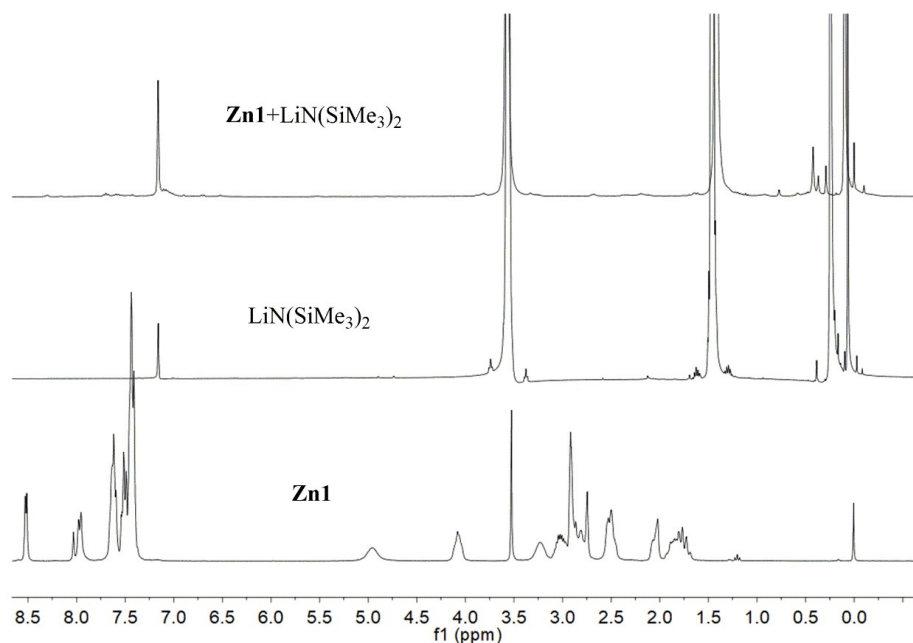

**Figure S39** Stacked  $^1\text{H}$  NMR spectra of  $\text{Zn1} + \text{LiN}(\text{SiMe}_3)_2$  after 30 minutes (top, in  $\text{C}_6\text{D}_6$  at 25  $^\circ\text{C}$ ),  $\text{LiN}(\text{SiMe}_3)_2$  (middle, in  $\text{C}_6\text{D}_6$  at 25  $^\circ\text{C}$ ) and  $\text{Zn1}$  (bottom, in  $\text{C}_3\text{D}_7\text{NO}$  at 25  $^\circ\text{C}$ )

## 7. $^1\text{H}$ NMR spectra of the PCLs obtained using $\text{Zn1}/2\text{LiN}(\text{SiMe}_3)_2$ ([Zn]) with different quenching solvents (Figures S40 - S42)

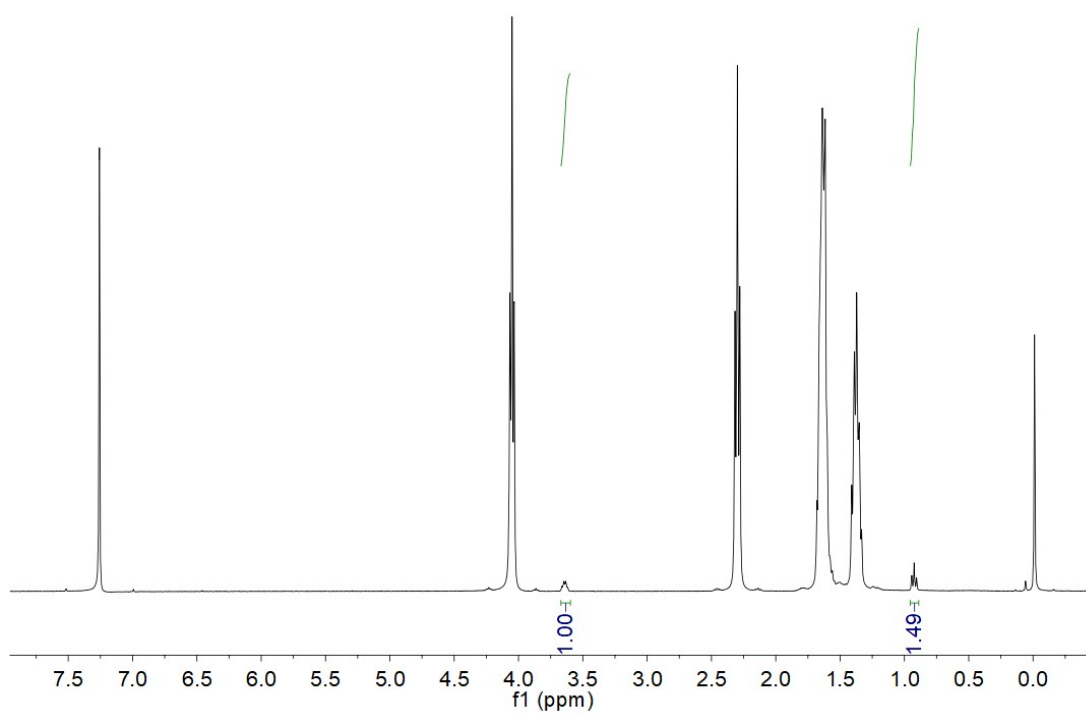

**Figure S40**  $^1\text{H}$  NMR spectrum of the PCL (run 6, Table 3) generated using **Zn1**/ $2\text{LiN}(\text{SiMe}_3)_2$  ( $[\text{Zn}]$ ) following quenching with *n*-butanol; recorded in  $\text{CDCl}_3$  at  $25\text{ }^\circ\text{C}$

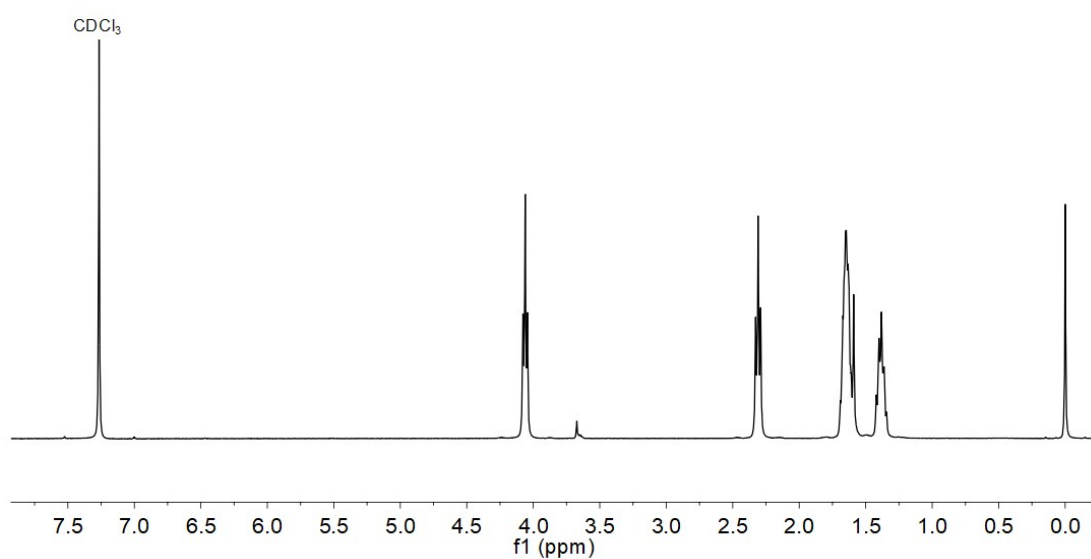

**Figure S41**  $^1\text{H}$  NMR spectrum of the PCL (run 6, Table 3) generated using **Zn1**/ $2\text{LiN}(\text{SiMe}_3)_2$  ( $[\text{Zn}]$ ) following quenching with methanol; recorded in  $\text{CDCl}_3$  at  $25\text{ }^\circ\text{C}$

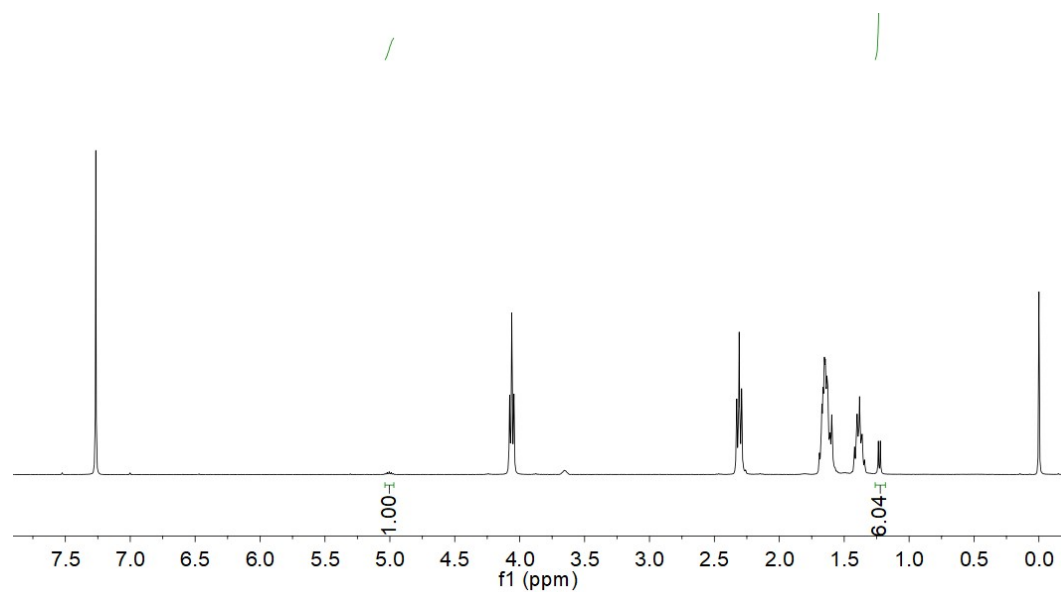

**Figure S42**  $^1\text{H}$  NMR spectrum of the PCL (run 6, Table 3) generated using **Zn1**/ $2\text{LiN}(\text{SiMe}_3)_2$  ( $[\text{Zn}]$ ) following quenching with *iso*-propanol; recorded in  $\text{CDCl}_3$  at  $25\text{ }^\circ\text{C}$

**8.  $^1\text{H}$  NMR and MALDI-TOF spectra for the PCL produced with  $\text{Zn1}/2\text{LiN}(\text{SiMe}_3)_2$  ( $[\text{Zn}]$ ) using a  $\text{CL}:[\text{Zn}]:\text{BnOH}$  molar ratio of 4000:1:1 (run 14, Table 3 & Figure S43)**

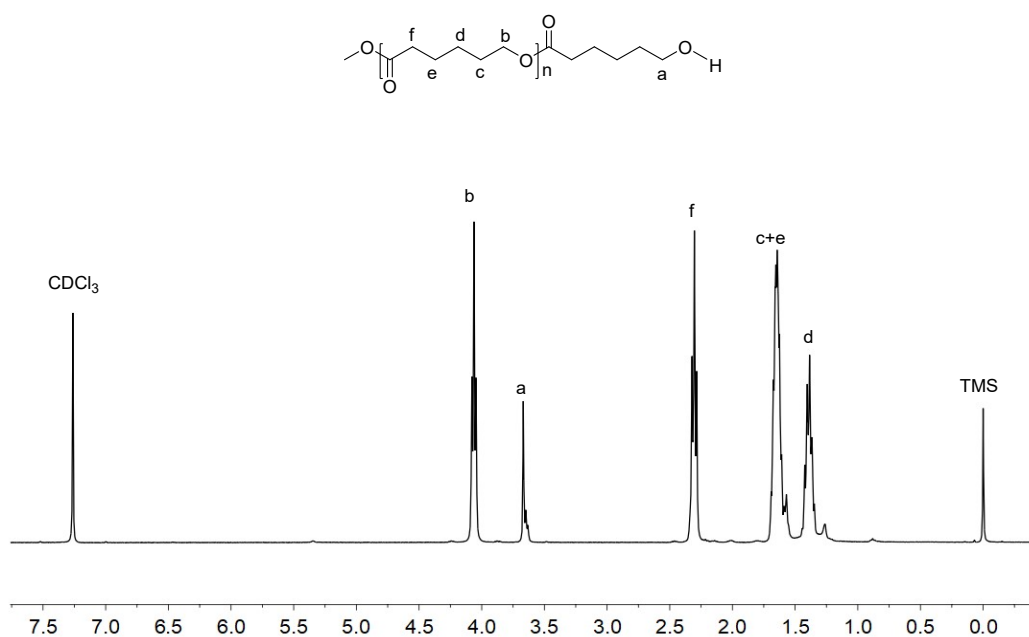

**Figure S43a**  $^1\text{H}$  NMR spectrum of the PCL generated with  $\text{Zn1}/2\text{LiN}(\text{SiMe}_3)_2$  ( $[\text{Zn}]$ ) using a  $\text{CL}:[\text{Zn}]:\text{BnOH}$  molar ratio of 4000:1:1 (run 14, Table 3); recorded in  $\text{CDCl}_3$ , 25 °C.

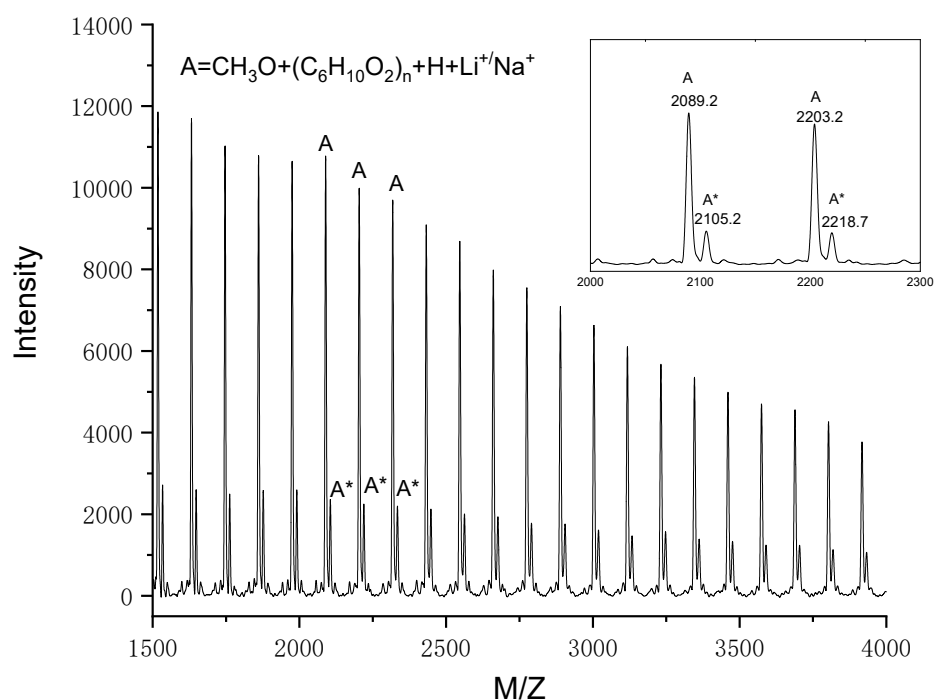

**Figure S43b** MALDI-TOF mass spectrum of the PCL generated with  $\text{Zn1}/2\text{LiN}(\text{SiMe}_3)_2$  ( $[\text{Zn}]$ ) using a  $\text{CL}:[\text{Zn}]:\text{BnOH}$  molar ratio of 4000:1:1 (run 14, Table 3).

**9.  $^1\text{H}$  NMR and MALDI-TOF spectra for the PCL produced with  $\text{Zn1}/2\text{LiN}(\text{SiMe}_3)_2$  ( $[\text{Zn}]$ ) using a  $\text{CL}:[\text{Zn}]:\text{BnOH}$  molar ratio of 5000:1:1 (run 15, Table 3 & Figure S44)**

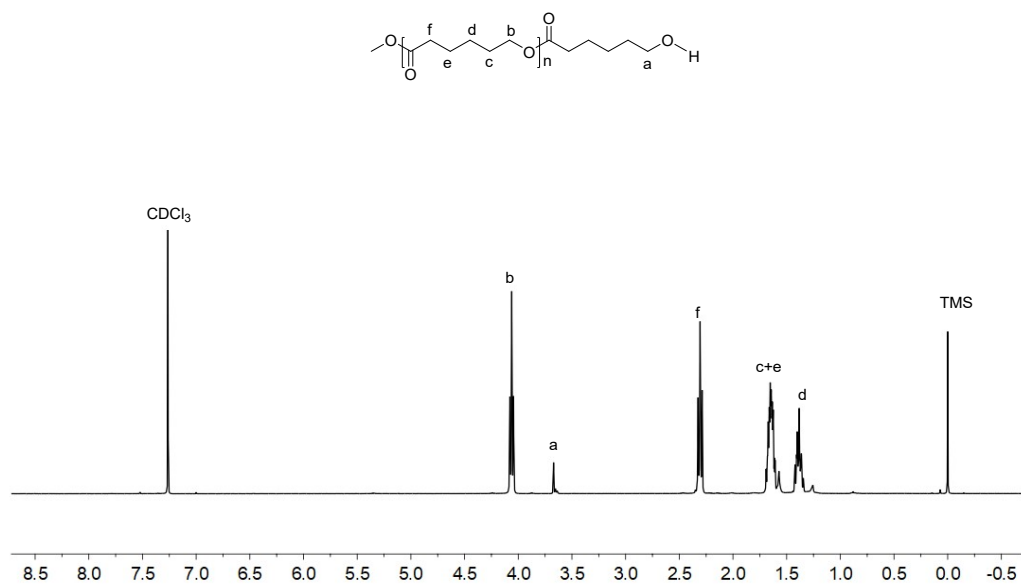

**Figure S44a**  $^1\text{H}$  NMR spectrum of the PCL generated with  $\text{Zn1}/2\text{LiN}(\text{SiMe}_3)_2$  ( $[\text{Zn}]$ ) using a  $\text{CL}:[\text{Zn}]:\text{BnOH}$  molar ratio of 5000:1:1 (run 15, Table 3); recorded in  $\text{CDCl}_3$ , 25 °C.

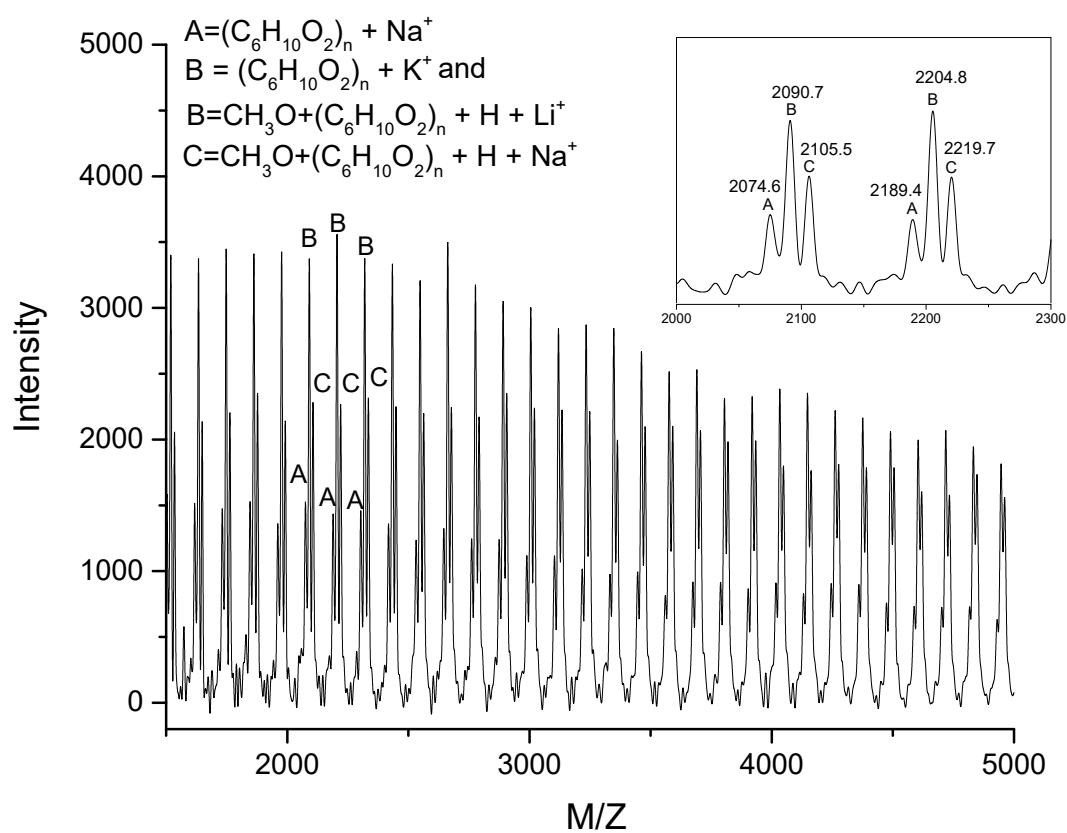

**Figure S44b** MALDI-TOF mass spectrum of the PCL generated with  $\text{Zn1}/2\text{LiN}(\text{SiMe}_3)_2$  ( $[\text{Zn}]$ ) using a  $\text{CL}:[\text{Zn}]:\text{BnOH}$  molar ratio of 5000:1:1 (run 15, Table 3).
